# Supplementary material
Source: Royal Society of Chemistry journal article supplement (doi:10.1039/d6nj00257a)
Supplement: d6nj00257a1.pdf [file d6nj00257a1.pdf]

Manuscript Type: **Research Article**  
Submitted to: **New Journal of Chemistry**  
Article number: **NJ-ART-01-2026-000257**

## Supplementary Information

### **Nickel(II)-Flavonolate Complexes of Tetradentate 4N Donor Ligands as Enzyme-Substrate Models of Quercetin-2,4-Dioxygenase: Role of Ligand Steric and Electronic Properties on Dioxygenolysis**

*Devaraj Karthickram<sup>a</sup>, Nattamai Bhuvanesh<sup>b</sup> and Karuppasamy Sundaravel<sup>a\*</sup>*

<sup>a</sup>Bioinorganic Research Laboratory, Department of Chemistry, Bharathiar University, Coimbatore - 641046, Tamil Nadu, India.

<sup>b</sup>X-ray Diffraction Laboratory, Texas A&M University, College Station, TX 77842, United States of America.

---

\* To whom correspondence should be addressed E-mail: [sundaravel.k@gmail.com](mailto:sundaravel.k@gmail.com),  
[sundaravel.k@buc.edu.in](mailto:sundaravel.k@buc.edu.in)

Tel: +91-82207 17342

## Table of Contents

| 1. Supplementary figures |                                                                                                                                                                                                                                                                                                                                                                                       | Page No   |
|--------------------------|---------------------------------------------------------------------------------------------------------------------------------------------------------------------------------------------------------------------------------------------------------------------------------------------------------------------------------------------------------------------------------------|-----------|
| Figure S1 & S2           | $^1\text{H}$ NMR spectra of ligands $\text{L}^{\text{H}}-\text{L}^{\text{Br}}$ in $\text{CDCl}_3$ at 298 K                                                                                                                                                                                                                                                                            | S3 & S4   |
| Figure S3 & S4           | ESI-MS profiles of ligands $\text{L}^{\text{H}}-\text{L}^{\text{Br}}$ in $\text{CH}_3\text{OH}$                                                                                                                                                                                                                                                                                       | S5 & S6   |
| Figure S5 & S6           | ESI-MS profiles of E-S model adducts <b>1–4</b> in $\text{CH}_3\text{OH}$                                                                                                                                                                                                                                                                                                             | S7 & S8   |
| Figure S7                | ATR-FTIR spectra of ligands $\text{L}^{\text{H}}-\text{L}^{\text{Br}}$ and E-S model adducts <b>1–4</b>                                                                                                                                                                                                                                                                               | S9        |
| Figure S8 & S9           | TG-DSC curves of E-S model adducts <b>1–4</b>                                                                                                                                                                                                                                                                                                                                         | S10 & S11 |
| Figure S10               | Spectrophotometric titration curves for the formation of Ni(II)-flavonolate adducts $[\text{Ni}(\text{II})(\text{L}^{\text{H}}-\text{L}^{\text{Br}}(\text{fla}))\text{ClO}_4$ <b>1–4</b> upon addition of methanolic solution of 3-hydroxyflavone to the <i>in situ</i> generated (a) <b>1</b> , (b) <b>2</b> , (c) <b>3</b> and (d) <b>4</b> at 25 °C under $\text{N}_2$ atmosphere. | S12       |
| Figure S11-S13           | UV-vis spectral changes observed for <b>2–4</b> at 5 min. intervals under $\text{O}_2$ atm at 70 °C                                                                                                                                                                                                                                                                                   | S13-S15   |
| Figure S14               | UV-vis spectral changes observed for <b>1</b> under $\text{O}_2$ atm at 25 °C                                                                                                                                                                                                                                                                                                         | S16       |
| Figure S15               | UV-vis spectral changes observed for <b>1</b> under $\text{N}_2$ atm at 70 °C                                                                                                                                                                                                                                                                                                         | S17       |
| Figure S16               | UV-vis spectral changes observed for <b>1–4</b> under $\text{O}_2$ atm and $\text{N}_2$ atm at 70 °C                                                                                                                                                                                                                                                                                  | S18       |
| Figure S17 & S18         | Gas chromatograms of kinetic product solution of <b>1–4</b> in methanol                                                                                                                                                                                                                                                                                                               | S19 & S20 |
| Figure S19               | GC-MS profiles of kinetic product solution of <b>3</b> in methanol                                                                                                                                                                                                                                                                                                                    | S21 & S22 |
| Figure S20               | ESI-MS profile of the kinetic product solution of <b>3</b> in methanol                                                                                                                                                                                                                                                                                                                | S23       |
| Figure S21               | Time-dependent product analysis of <b>3</b>                                                                                                                                                                                                                                                                                                                                           | S24       |
| Figure S22               | Time-dependent product analysis of $[\text{Ni}(\text{L}^{\text{OMe}})(\text{fla})]\text{ClO}_4$ <b>3</b> in the absence and presence of different equiv. of TEMPO recorded in $\text{CH}_3\text{OH}$ .                                                                                                                                                                                | S25       |

## 2. Supplementary Tables



Figure S2

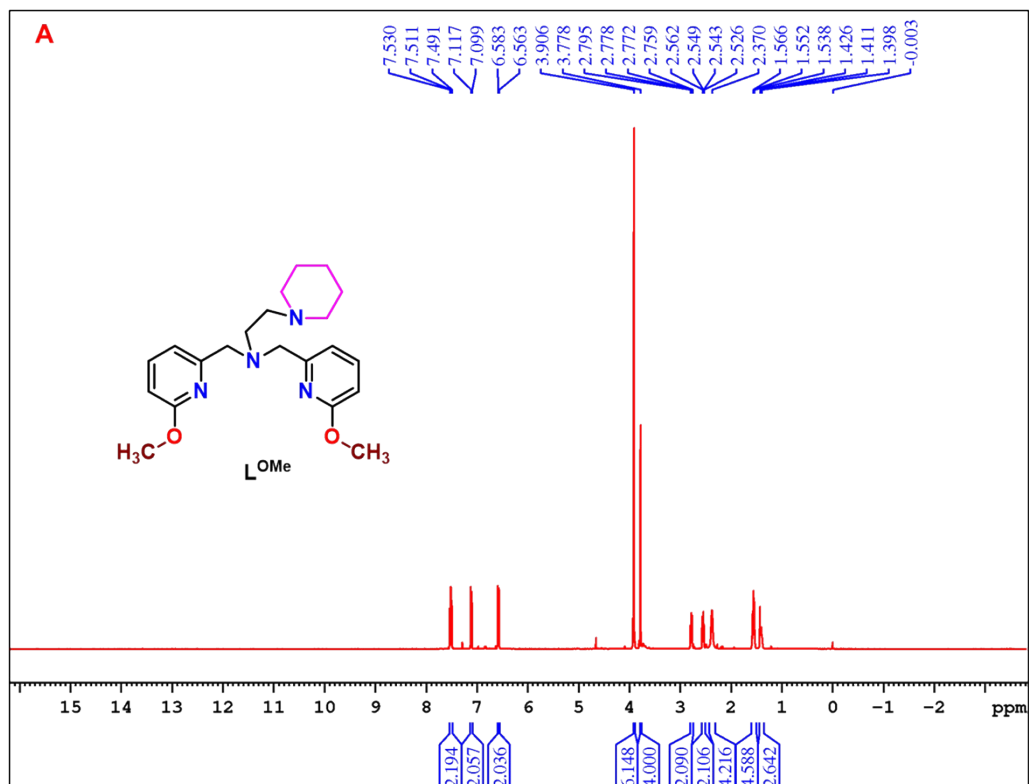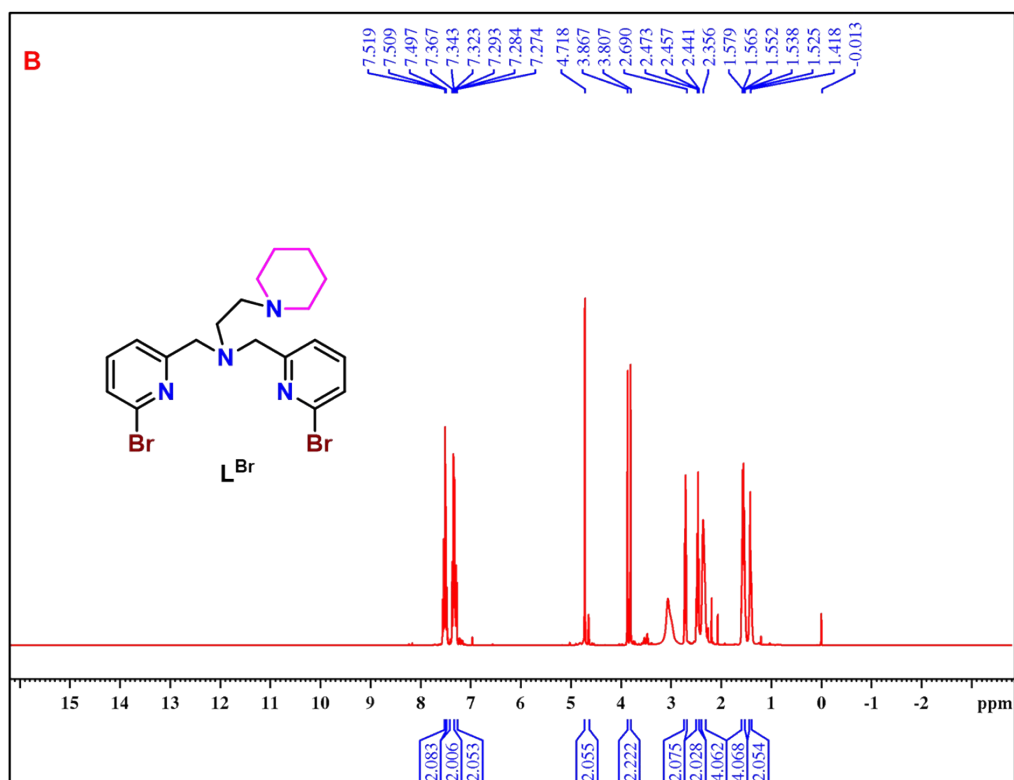

Fig. S2  $^1\text{H}$  NMR spectra of ligands (A)  $\text{L}^{\text{OMe}}$  and (B)  $\text{L}^{\text{Br}}$  in  $\text{CDCl}_3$  at 298 K.

Figure S3

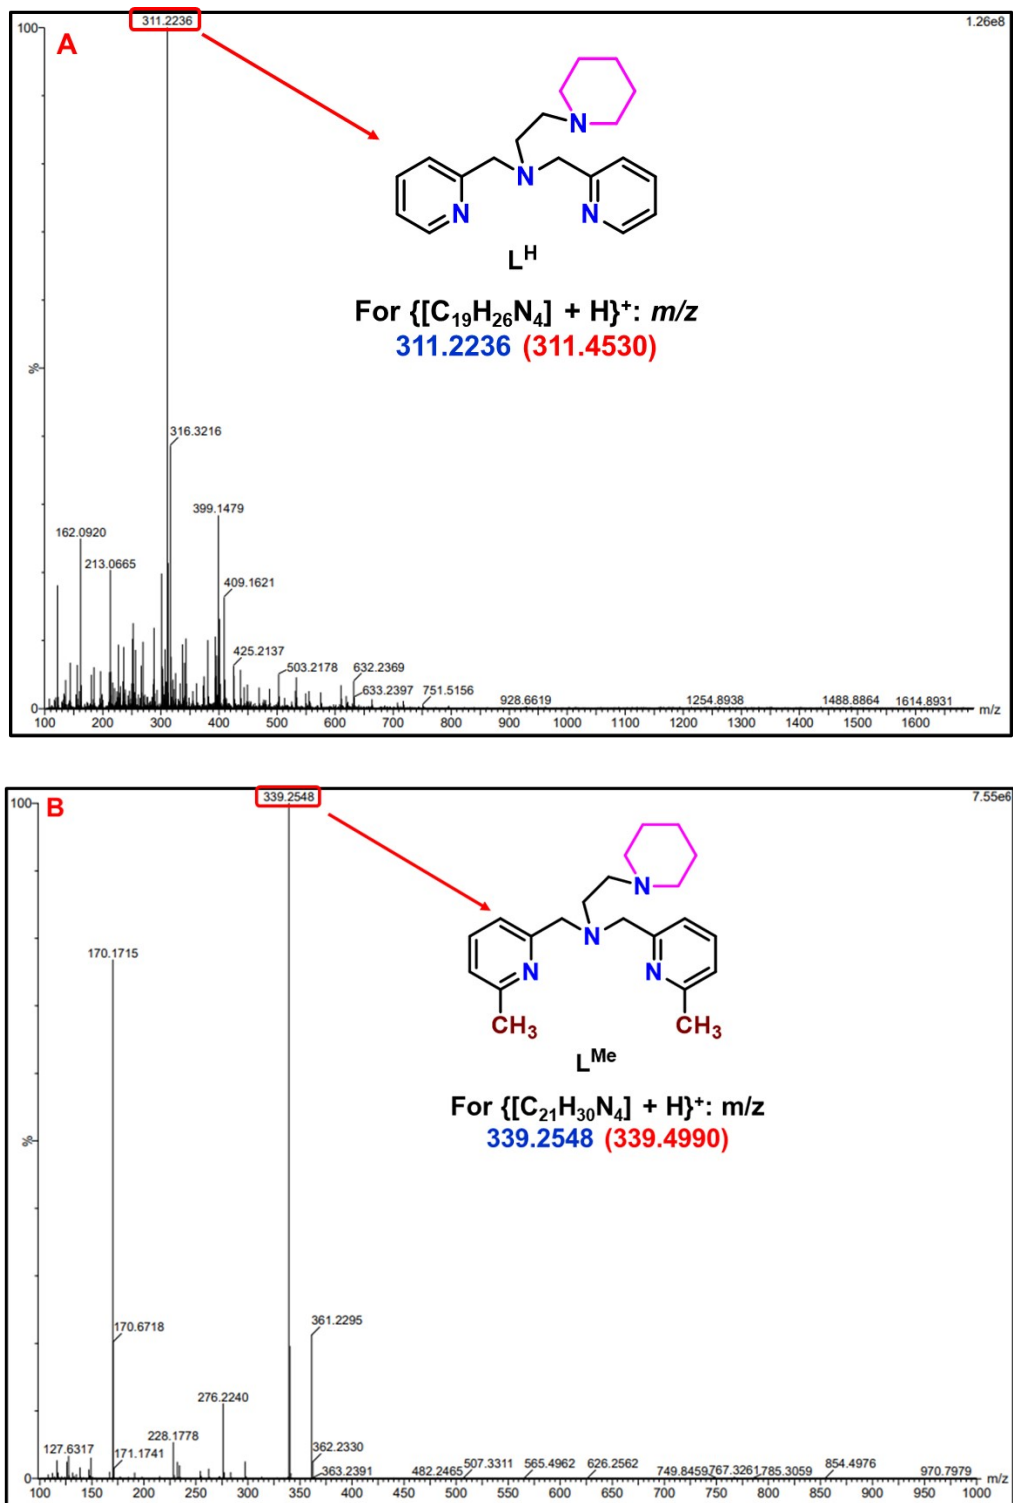

Fig. S3 ESI-MS spectral profiles of complexes (A)  $\text{L}^{\text{H}}$  and (B)  $\text{L}^{\text{Me}}$  recorded in  $\text{CH}_3\text{OH}$ .

Figure S4

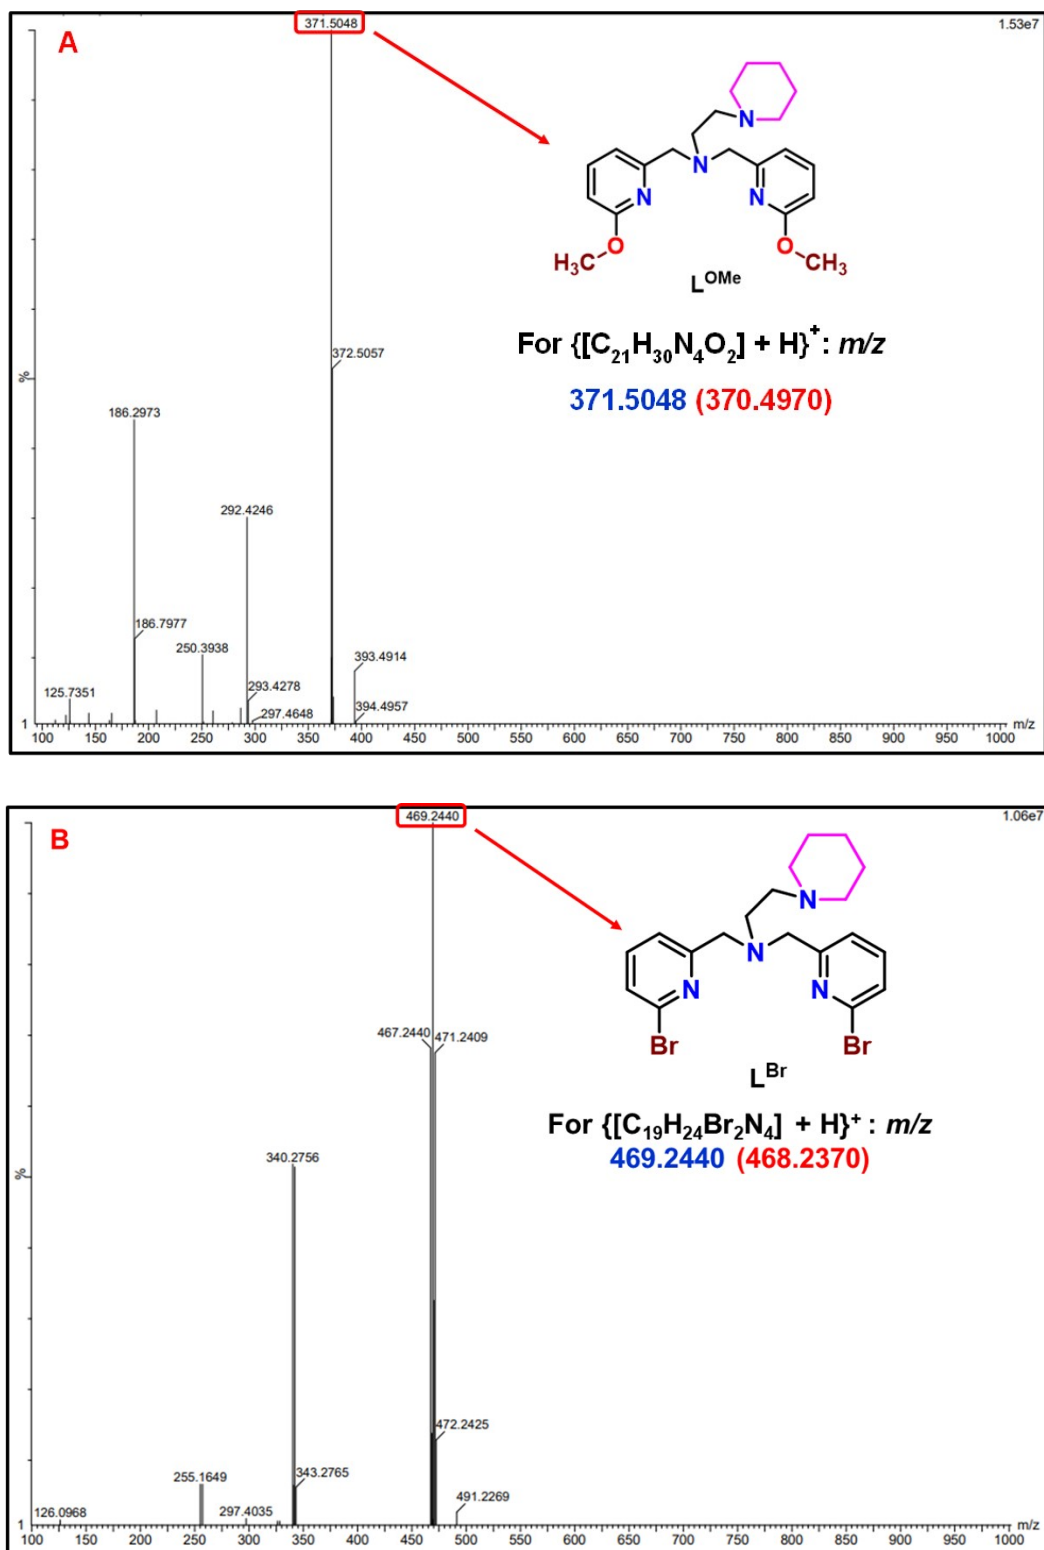

Fig. S4 ESI-MS spectral profiles of complexes (A) L<sup>OMe</sup> and (B) L<sup>Br</sup> recorded in CH<sub>3</sub>OH.

Figure S5

Spectrum Plot Report

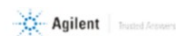

|                |        |              |         |            |              |                                 |
|----------------|--------|--------------|---------|------------|--------------|---------------------------------|
| Name           | 1 RE   | Rack Pos.    |         | Instrument | Instrument 1 | Operator                        |
| Inj. Vol. (ul) | 10     | Plate Pos.   |         | IRM Status | Success      |                                 |
| Data File      | 1 RE.d | Method (Acq) | GCN-1.m | Comment    |              | Acq. Time (Local)               |
|                |        |              |         |            |              | 10-03-2026 15:15:56 (UTC+05:30) |

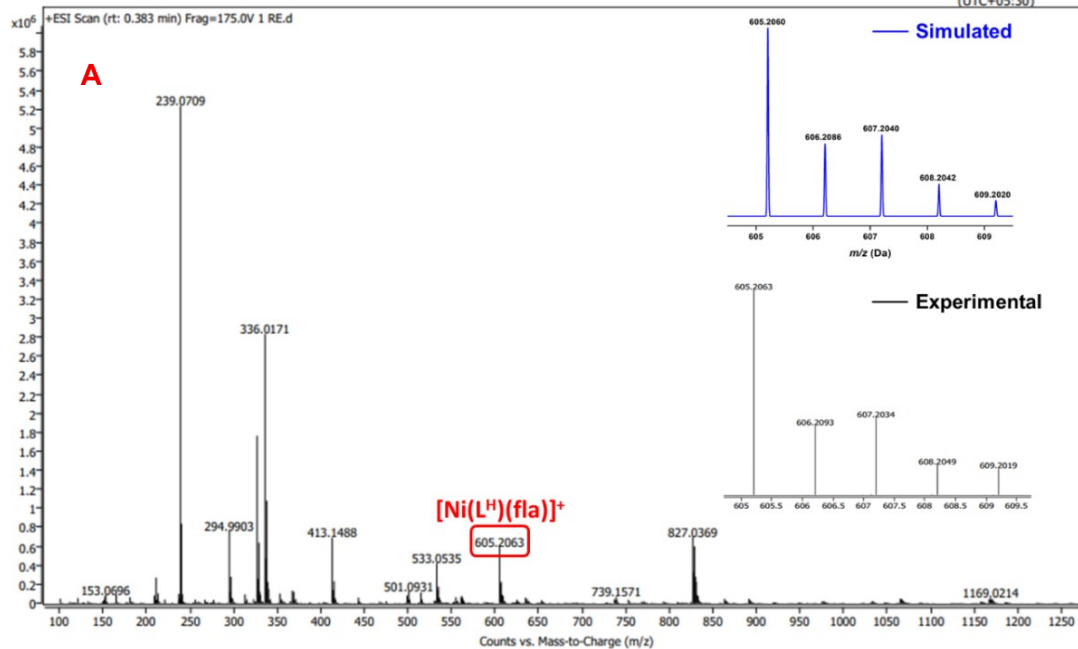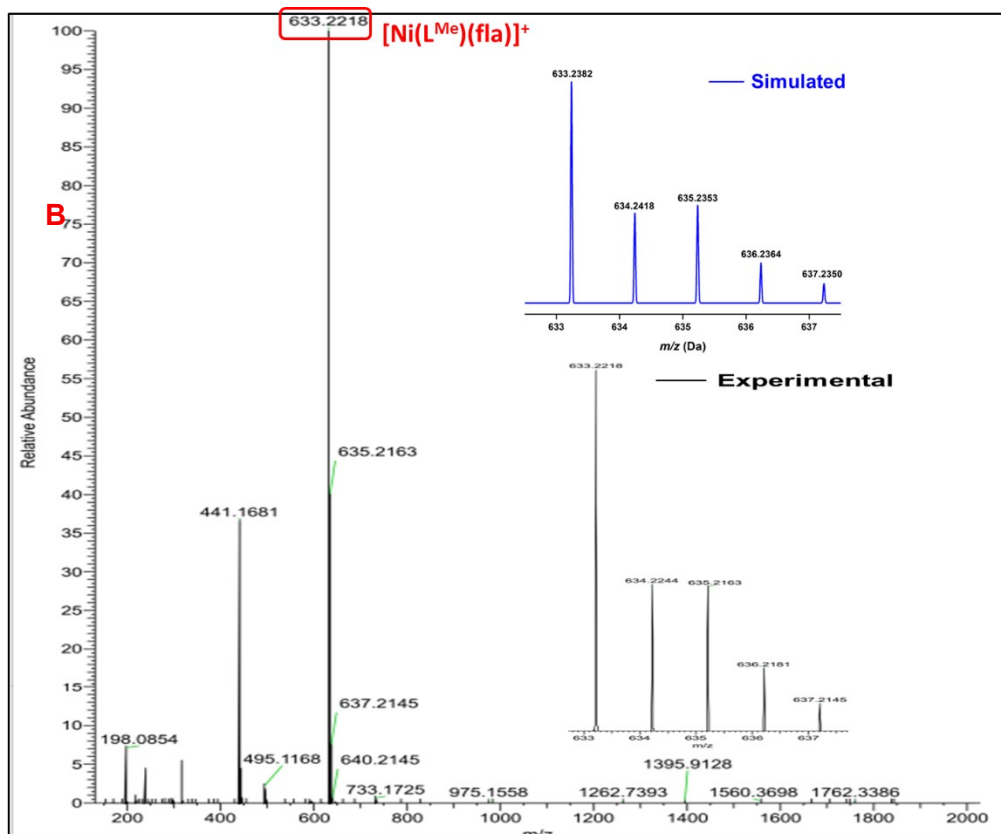

**Fig. S5** ESI-MS profiles of E-S model adducts (A)  $[\text{Ni}(\text{L}^{\text{H}})(\text{fla})]\text{ClO}_4$  **1** and (B)  $[\text{Ni}(\text{L}^{\text{Me}})(\text{fla})]\text{ClO}_4$  **2** recorded in  $\text{CH}_3\text{OH}$ . Inset shows the simulated and experimental isotopic distribution pattern of complexes.

**Figure S6**

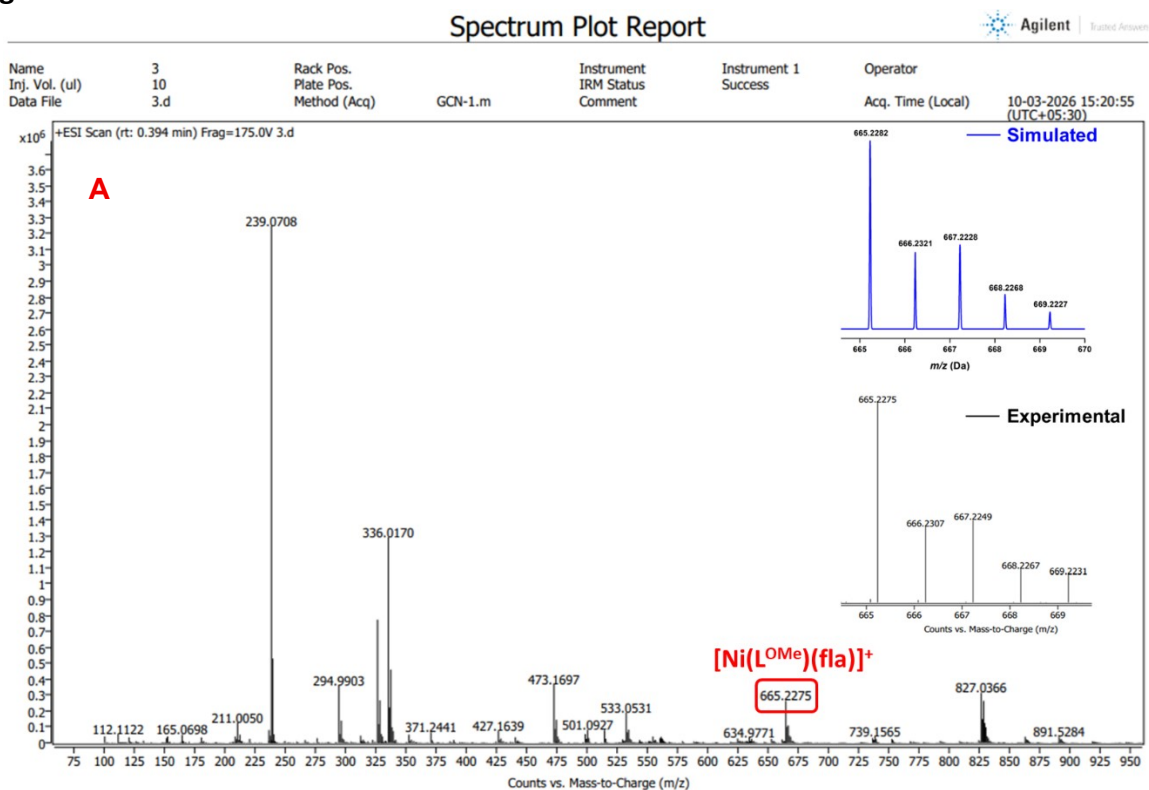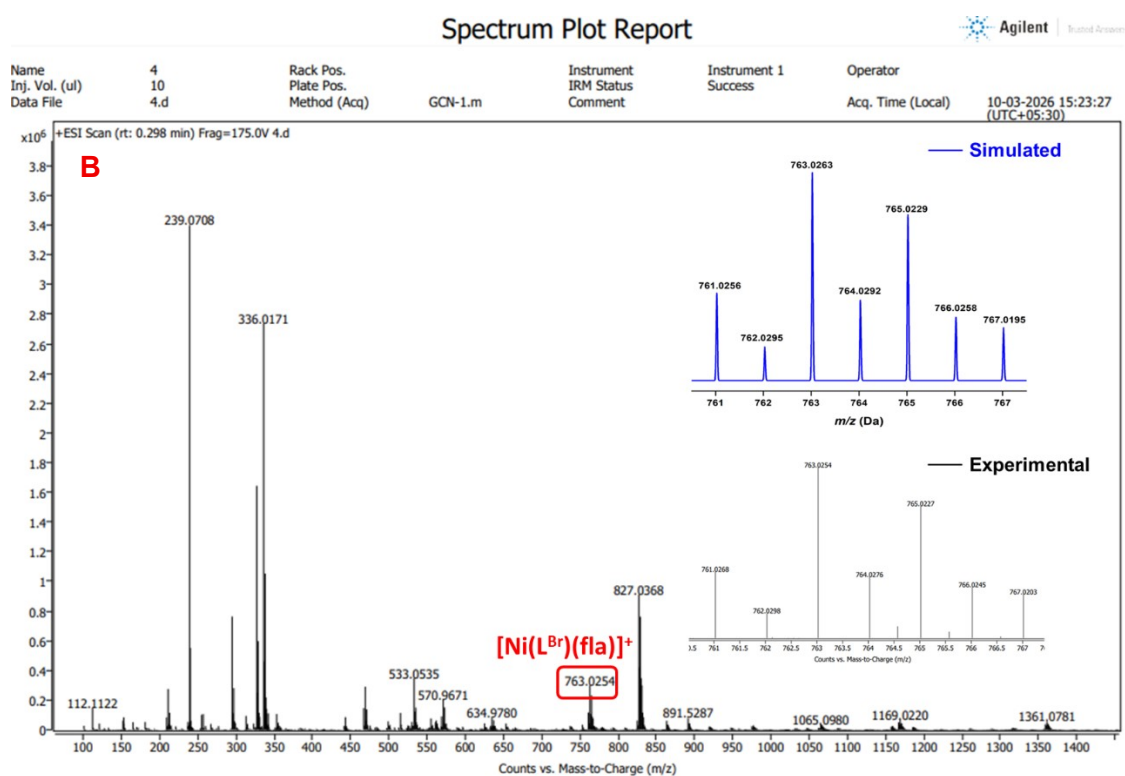

**Fig. S6** ESI-MS profile of E-S model adducts (A)  $[\text{Ni}(\text{L}^{\text{OMe}})(\text{fla})]\text{ClO}_4$  **3** and (B)  $[\text{Ni}(\text{L}^{\text{Br}})(\text{fla})]\text{ClO}_4$  **4** recorded in  $\text{CH}_3\text{OH}$ . Inset shows the simulated and experimental isotopic distribution pattern of complexes.

**Figure S7**

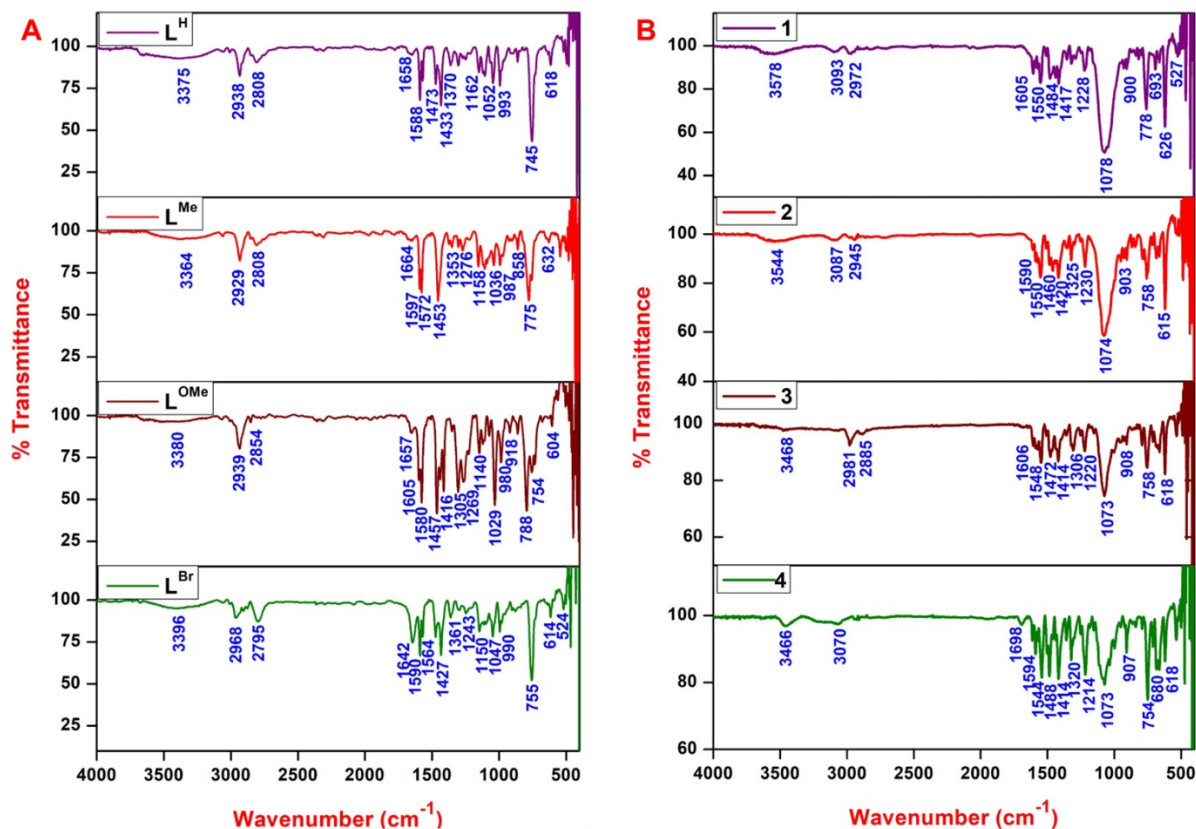

**Fig. S7** ATR-FTIR spectra of ligands  $\text{L}^{\text{H}}\text{--}\text{L}^{\text{Br}}$  (A) and nickel(II)-flavonolate adducts **1**–**4** (B).

Figure S8

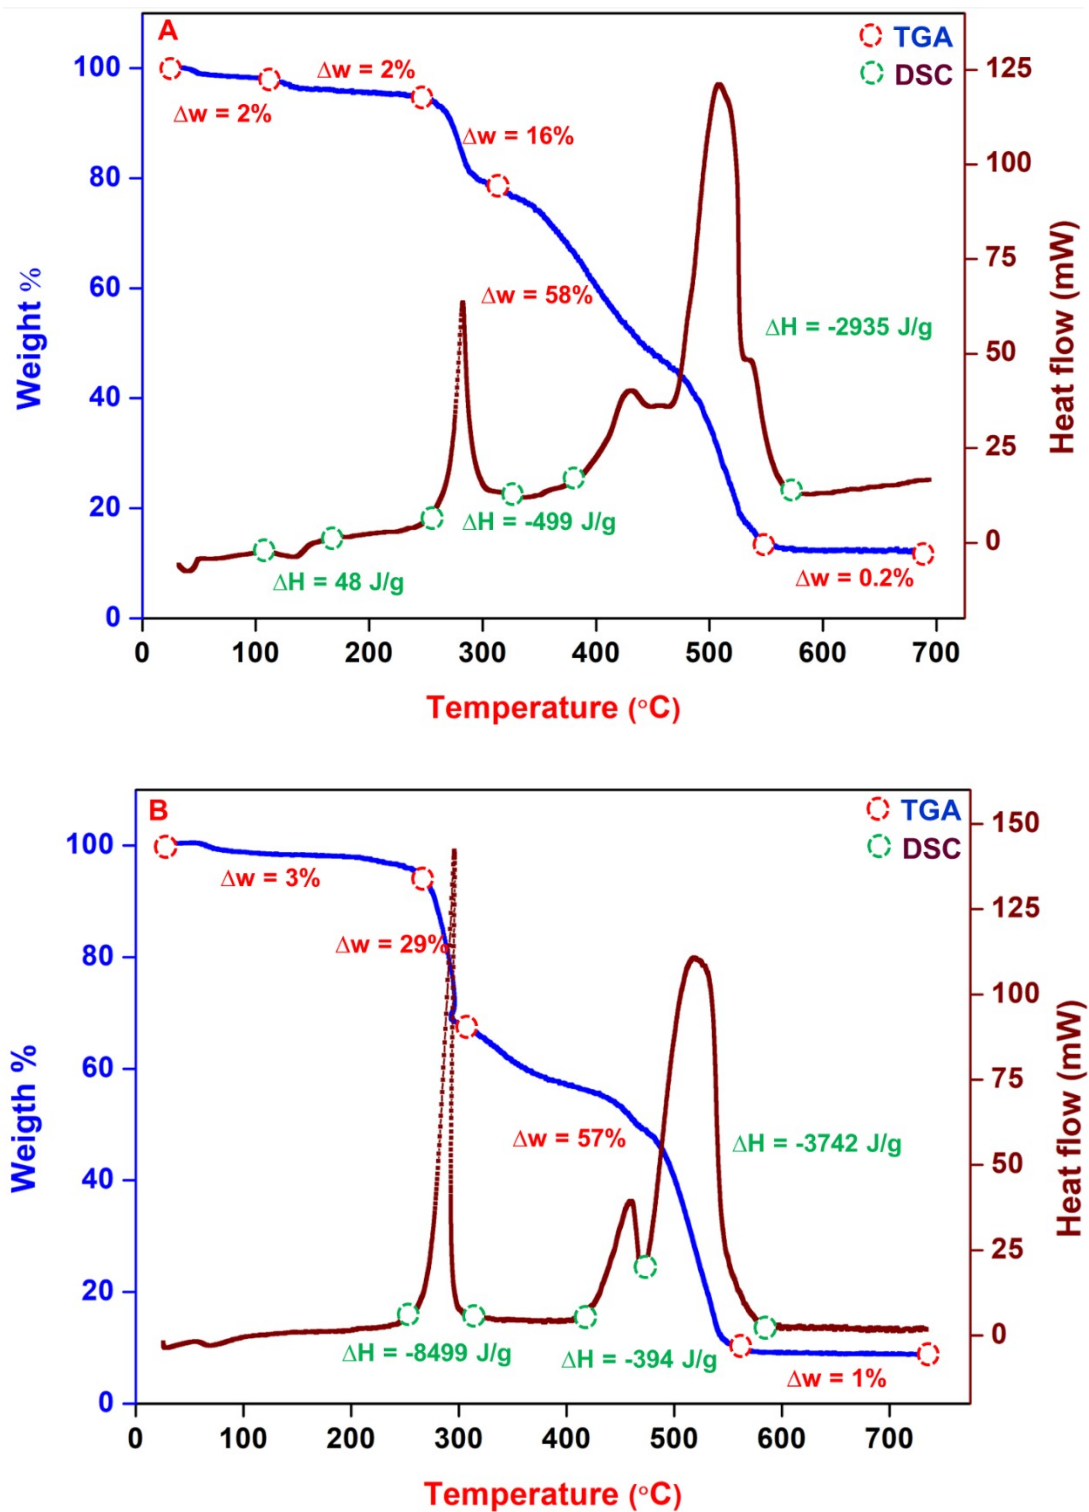

Fig. S8 TG-DSC profiles of (A) 1 and (B) 2.

Figure S9

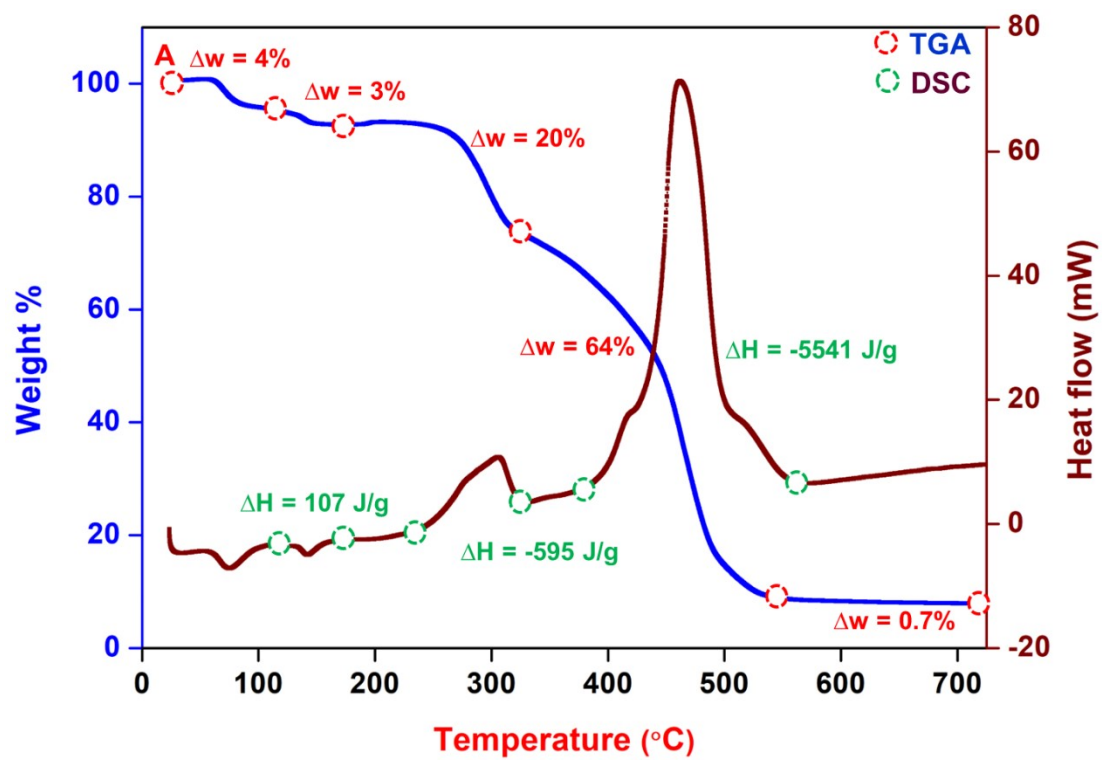

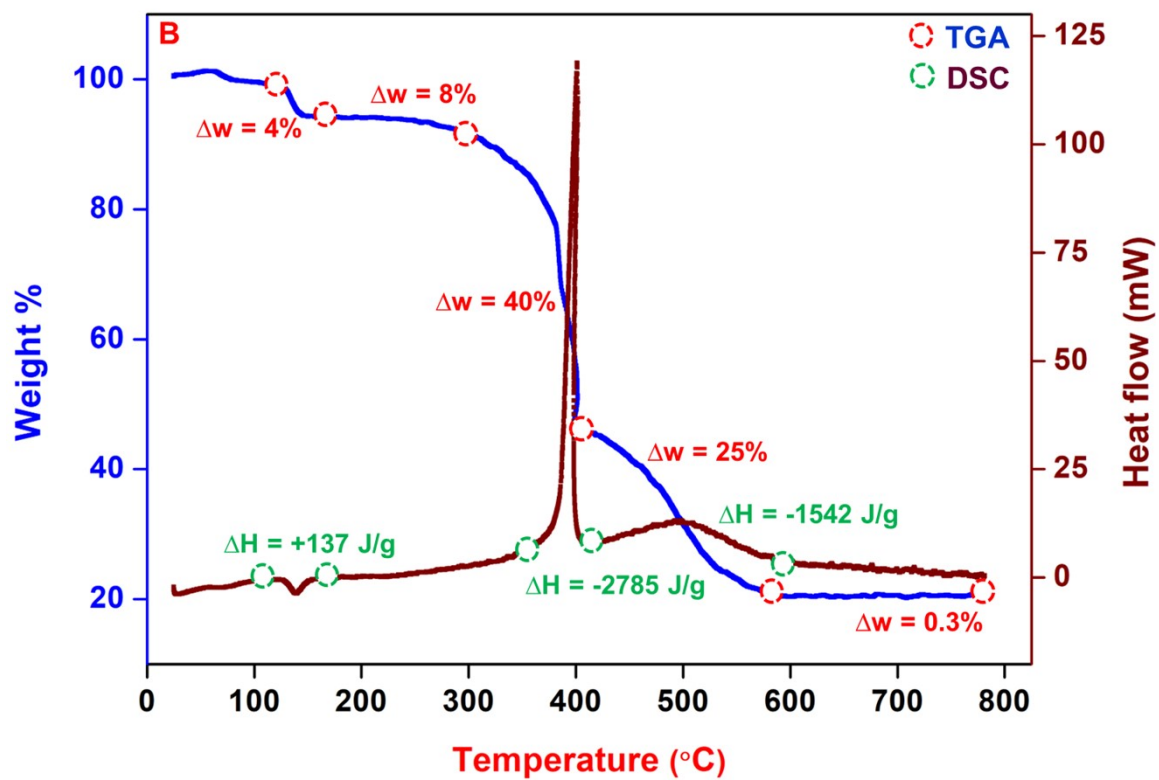

Fig. S9 TG-DSC profiles of (A) 3 and (B) 4.

Figure S10

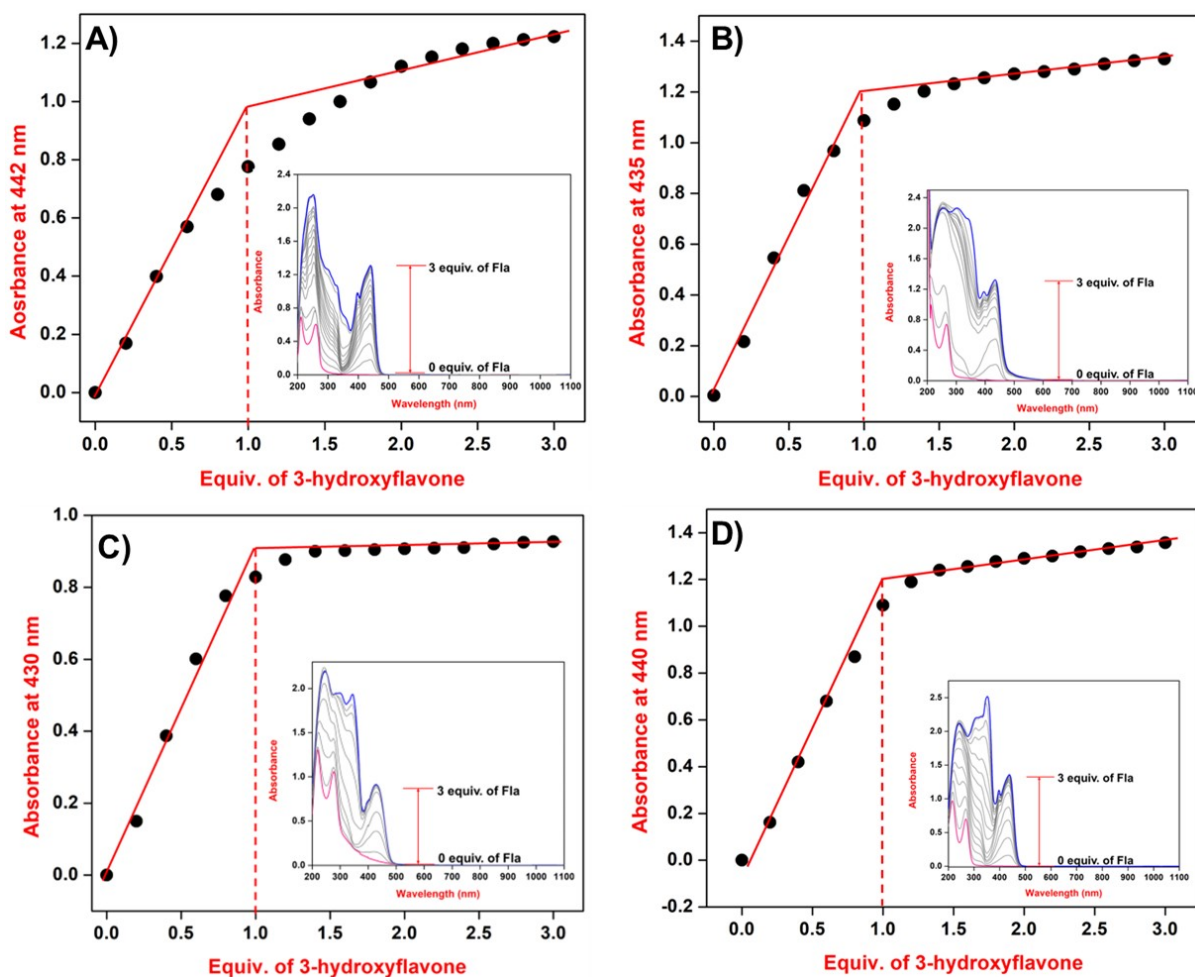

**Fig. S10** Spectrophotometric titration curves for the formation of Ni(II)-flavonolate adducts  $[\text{Ni}(\text{II})(\text{L}^{\text{H}}\text{-L}^{\text{Br}}(\text{fla}))](\text{ClO}_4)_2$  **1–4** upon addition of methanolic solution of flavonolate to the *in situ* generated (A) **1**, (B) **2**, (C) **3** and (D) **4** at 25 °C under  $\text{N}_2$  atmosphere. Inset shows the growth of  $\pi \rightarrow \pi^*$  transition band ( $\sim 420\text{--}430$  nm) due to coordinated flavonolate.

**Figure S11**

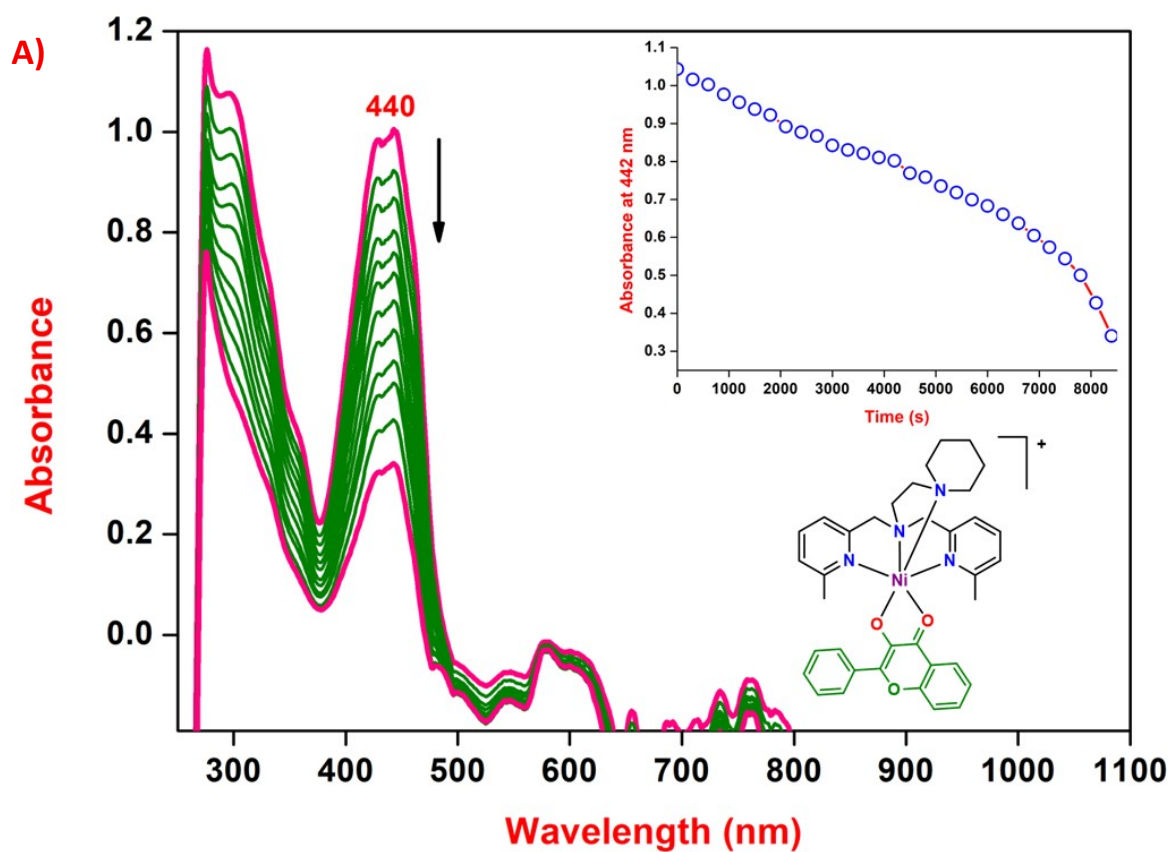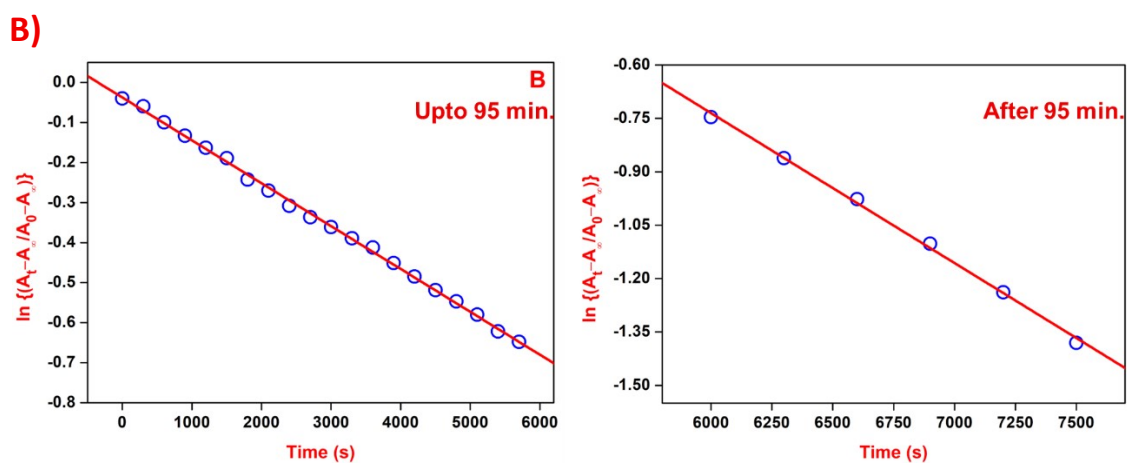

**Fig. S11** (A) Electronic absorption spectral changes of **2** monitored at 442 nm in DMF under O<sub>2</sub> atmosphere at 70 °C. Inset shows the time trace of the reaction. (B) Plot of time vs  $\ln\{(A_t - A_\infty)/(A_0 - A_\infty)\}$ .

**Figure S12**

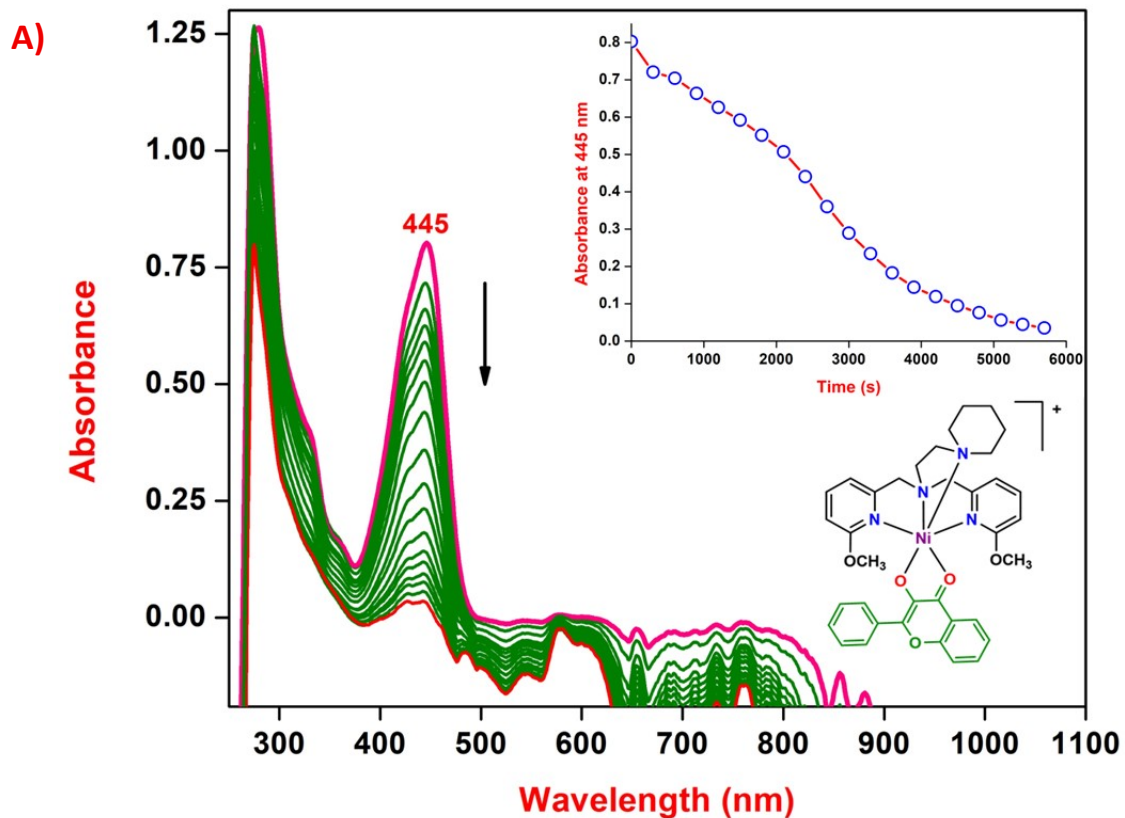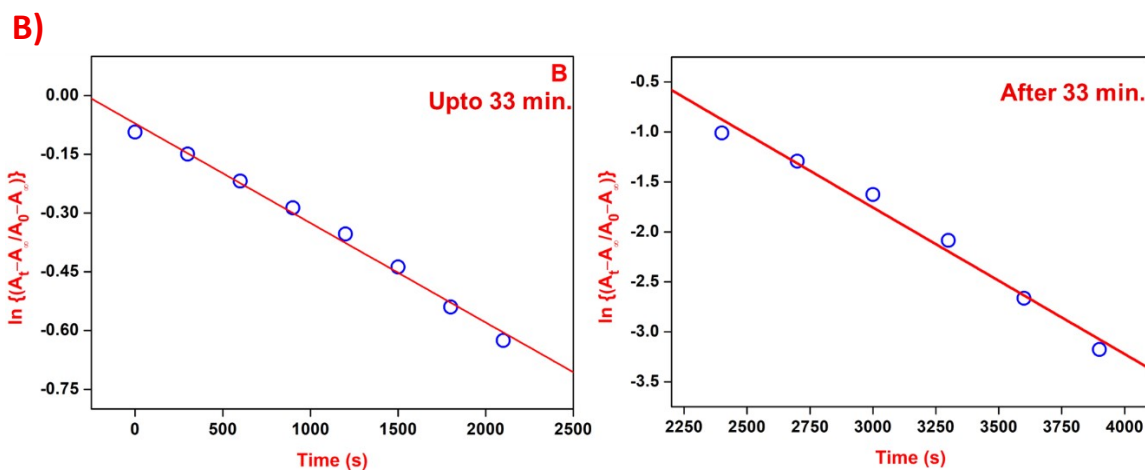

**Fig. S12** (A) Electronic absorption spectral changes of **3** monitored at 442 nm in DMF under O<sub>2</sub> atmosphere at 70 °C. Inset shows the time trace of the reaction. (B) Plot of time vs  $\ln \left\{ \frac{(A_t - A_0)}{(A_t - A_\infty)} \right\}$ .

**Figure S13**

**A)**

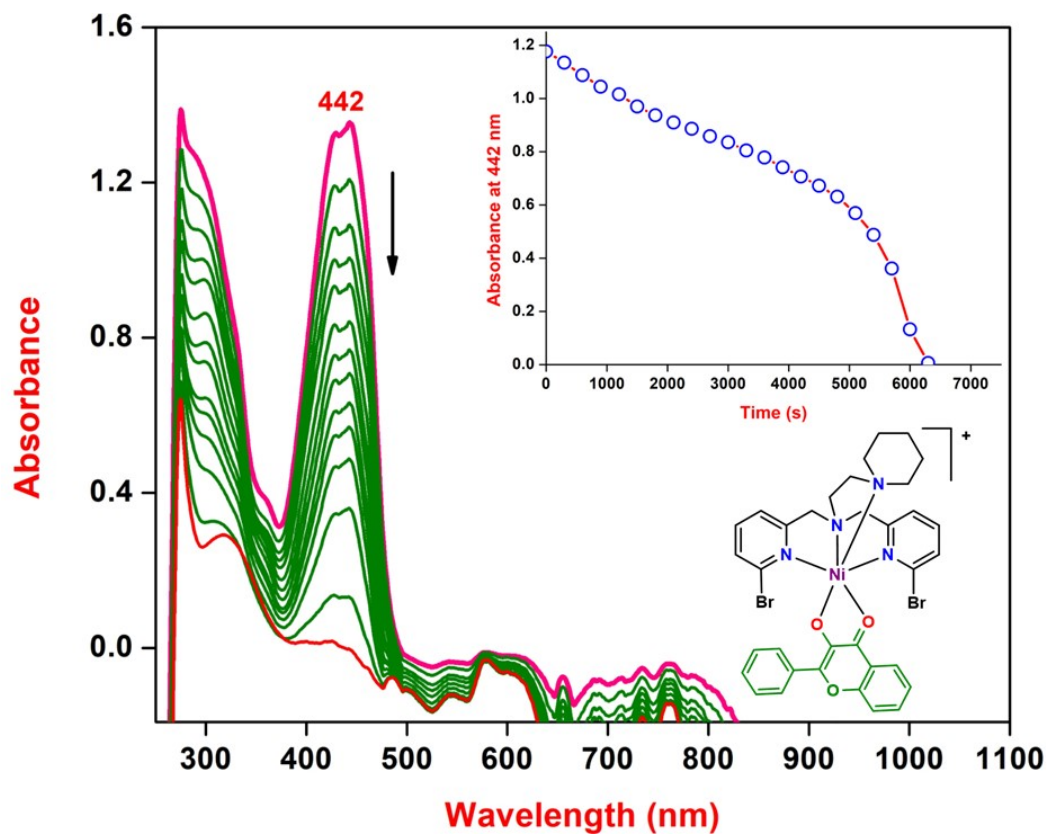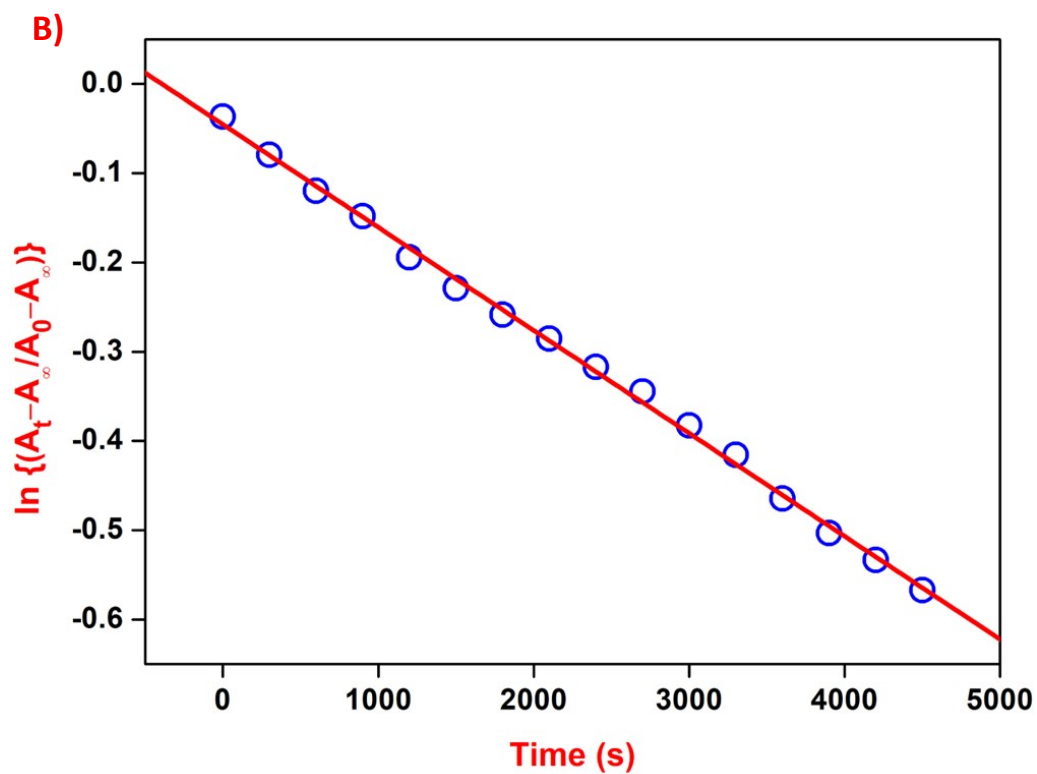

**Fig. S13** (A) Electronic absorption spectral changes of **4** monitored at 442 nm in DMF under O<sub>2</sub> atmosphere at 70 °C. Inset shows the time trace of the reaction. (B) Plot of time vs  $\ln \left\{ \frac{A_t - A_\infty}{A_0 - A_\infty} \right\}$ .

**Figure S14**

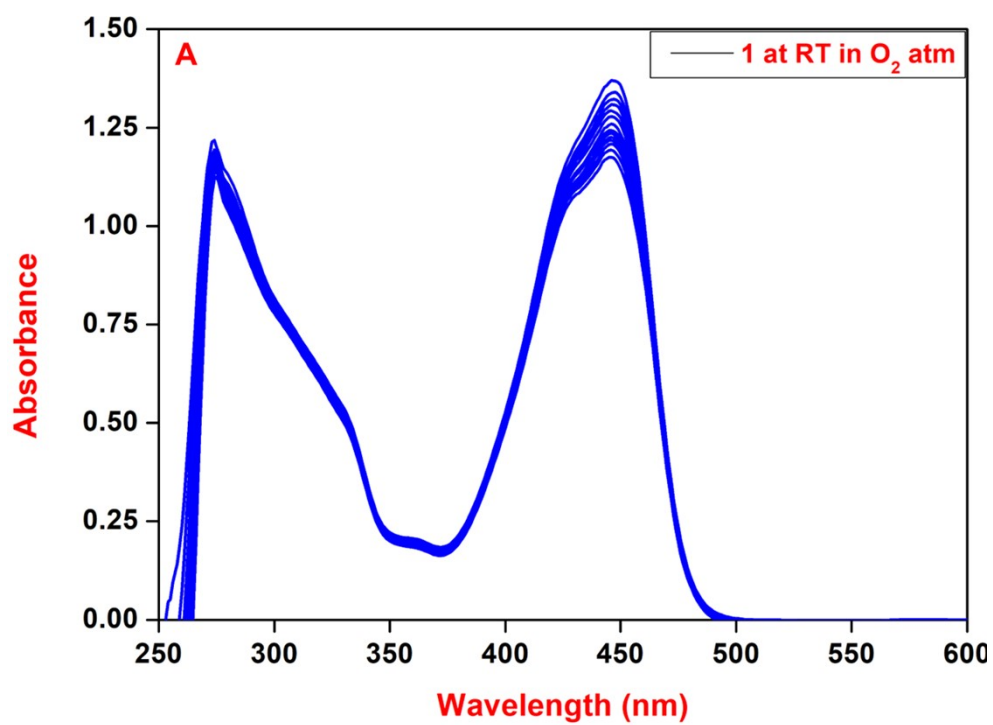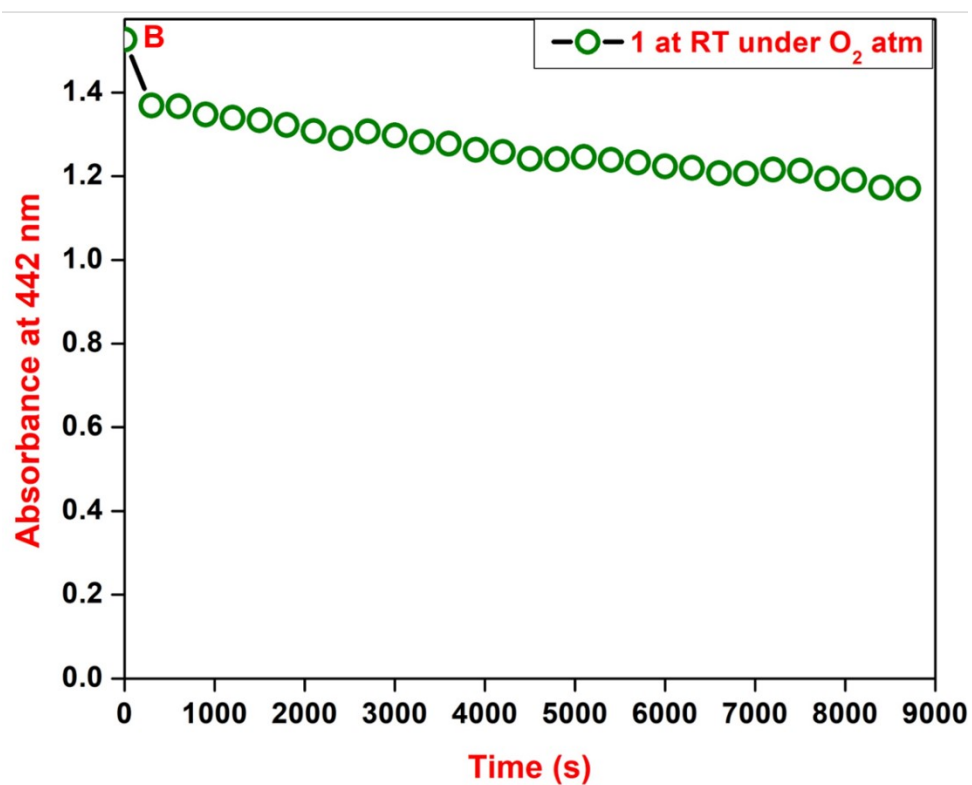

**Fig. S14.** (A) Electronic absorption spectral changes of **1** tracked at 442 nm in DMF at 25 °C in the presence of O<sub>2</sub>. (B) Time trace of the reaction.

Figure S15

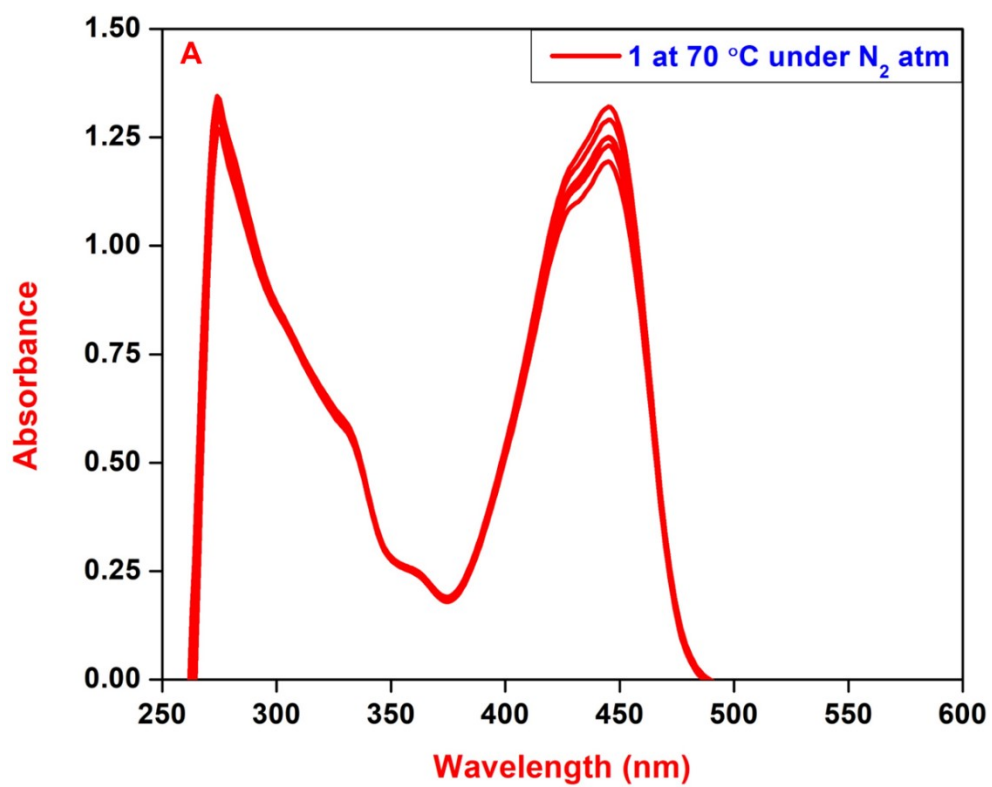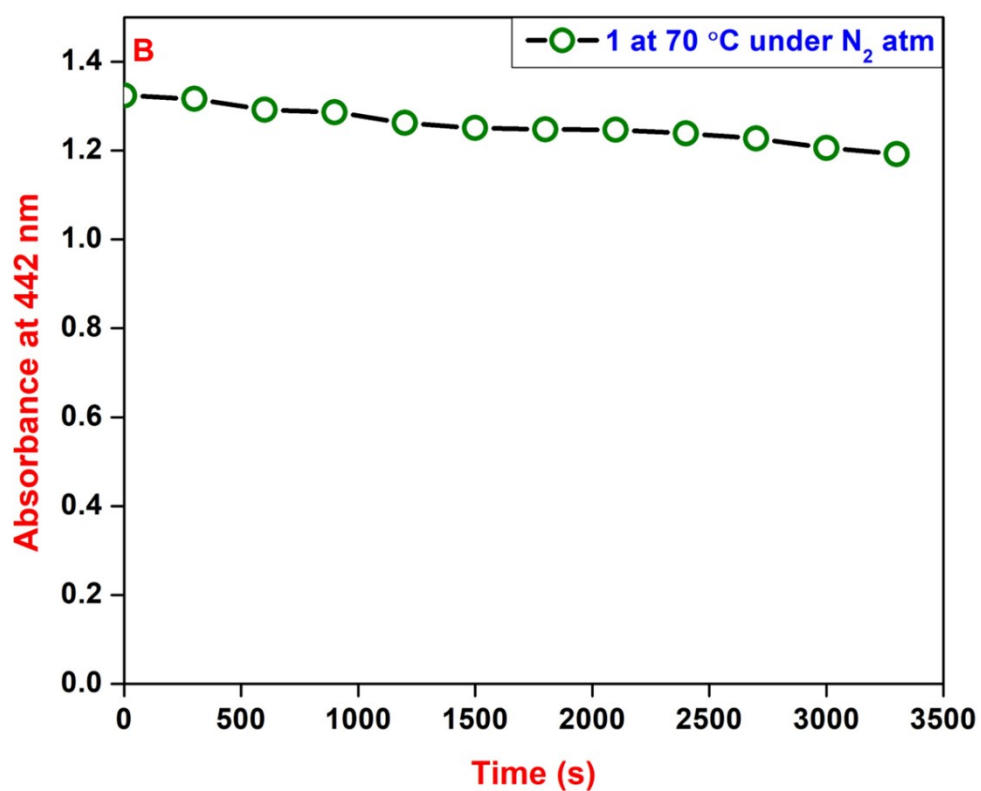

**Fig. S15** (A) Electronic absorption spectral changes of [Ni(L<sup>H</sup>)fla](ClO<sub>4</sub>) **1** followed at 442 nm in DMF under N<sub>2</sub> atmosphere at 70 °C. (B) Time trace of the reaction.

Figure S16

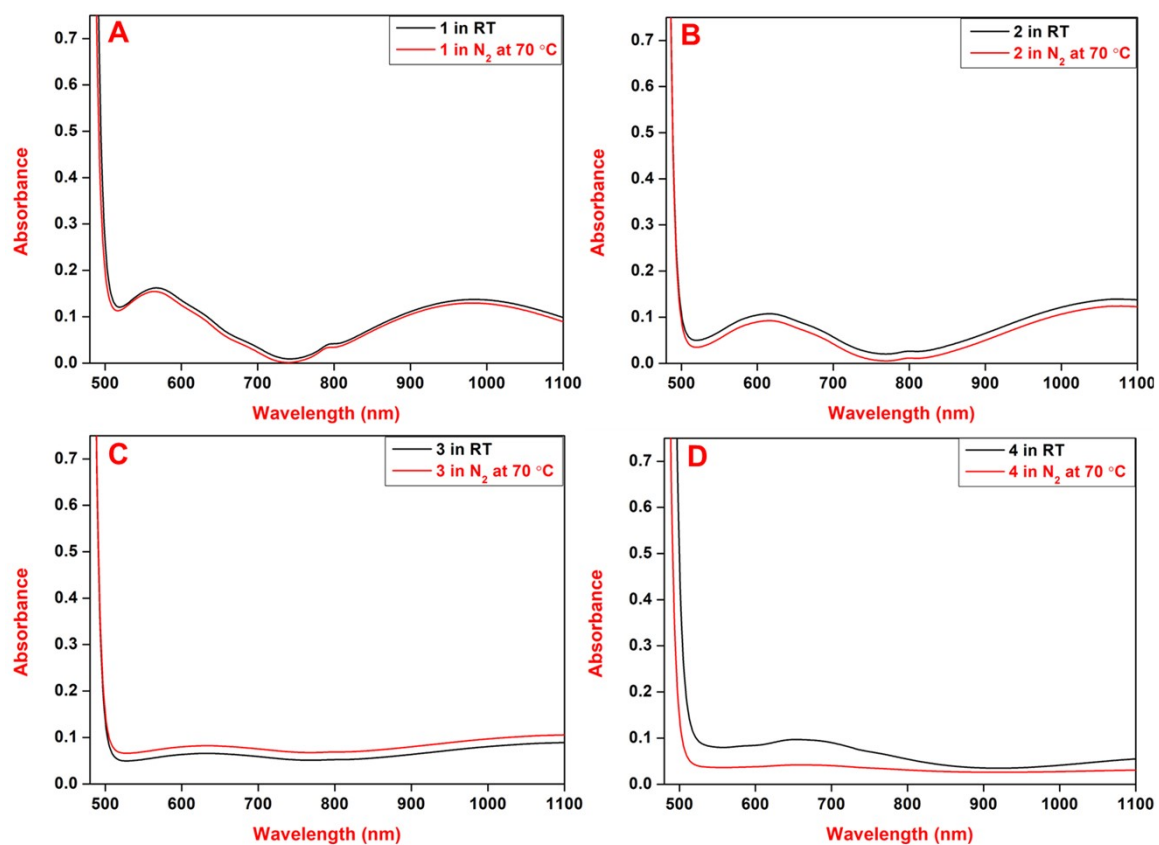

**Fig. S16** (A) Electronic absorption spectral measurements of  $[\text{Ni}(\text{L}^{\text{H}}-\text{L}^{\text{Br}})\text{fla}]^+$  **1-4** tracked at 25 °C (**black**) and 70 °C under  $\text{N}_2$  atm (**red**).

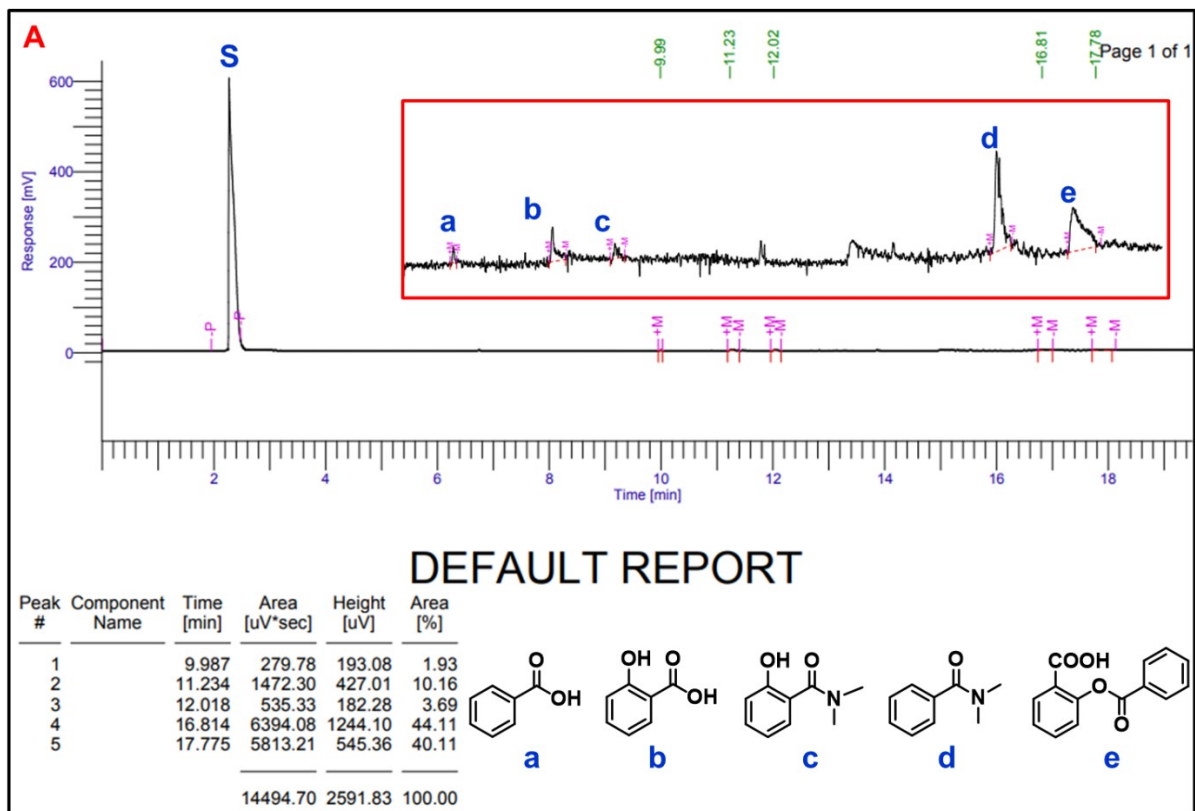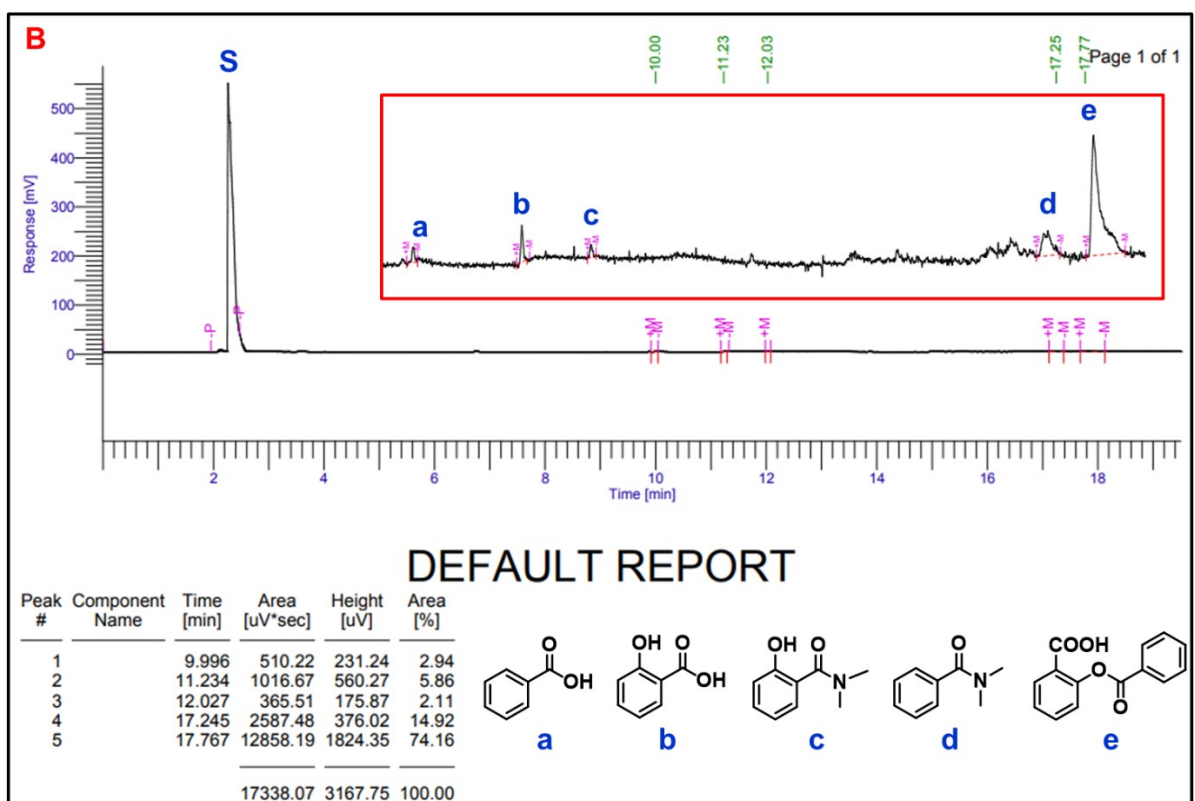

**Fig. S17** Gas chromatogram of the product solution of  $[\text{Ni}(\text{L}^{\text{H}})(\text{fla})]\text{ClO}_4$  **1** (A) and  $[\text{Ni}(\text{L}^{\text{Me}})(\text{fla})]\text{ClO}_4$  **2** (B) in  $\text{CH}_3\text{OH}$ .

**Figure S18**

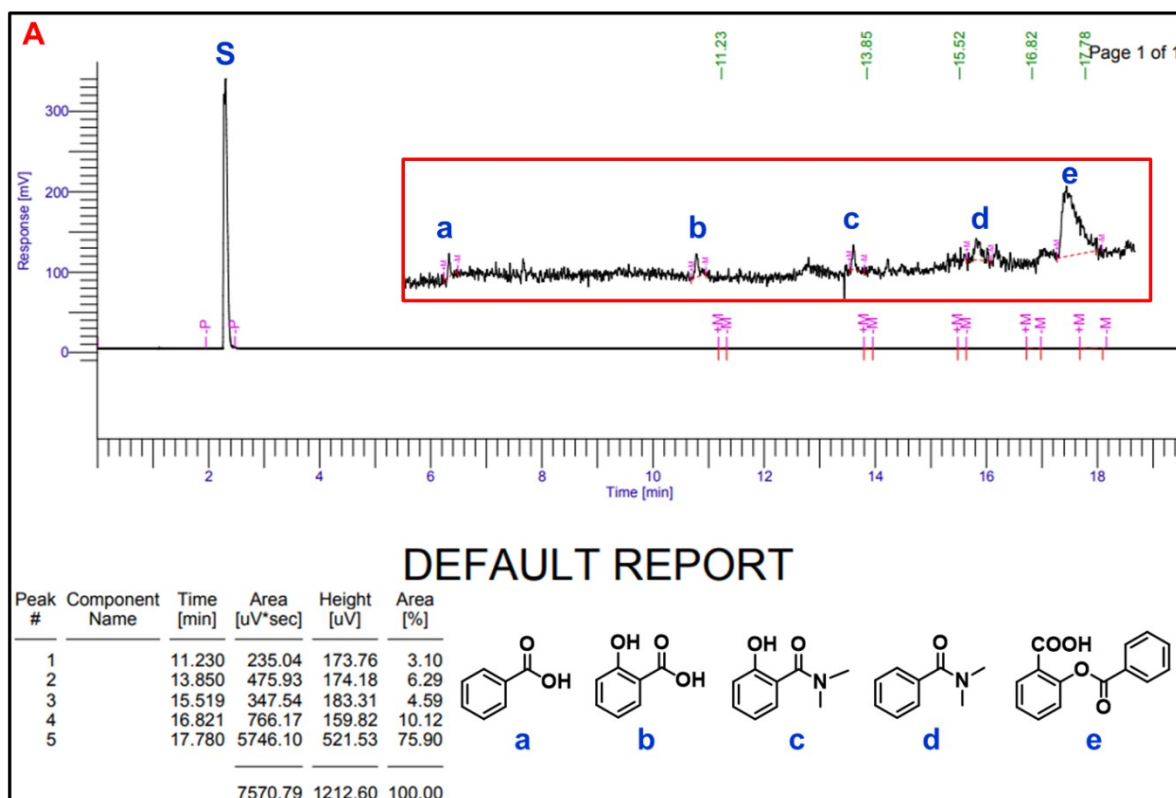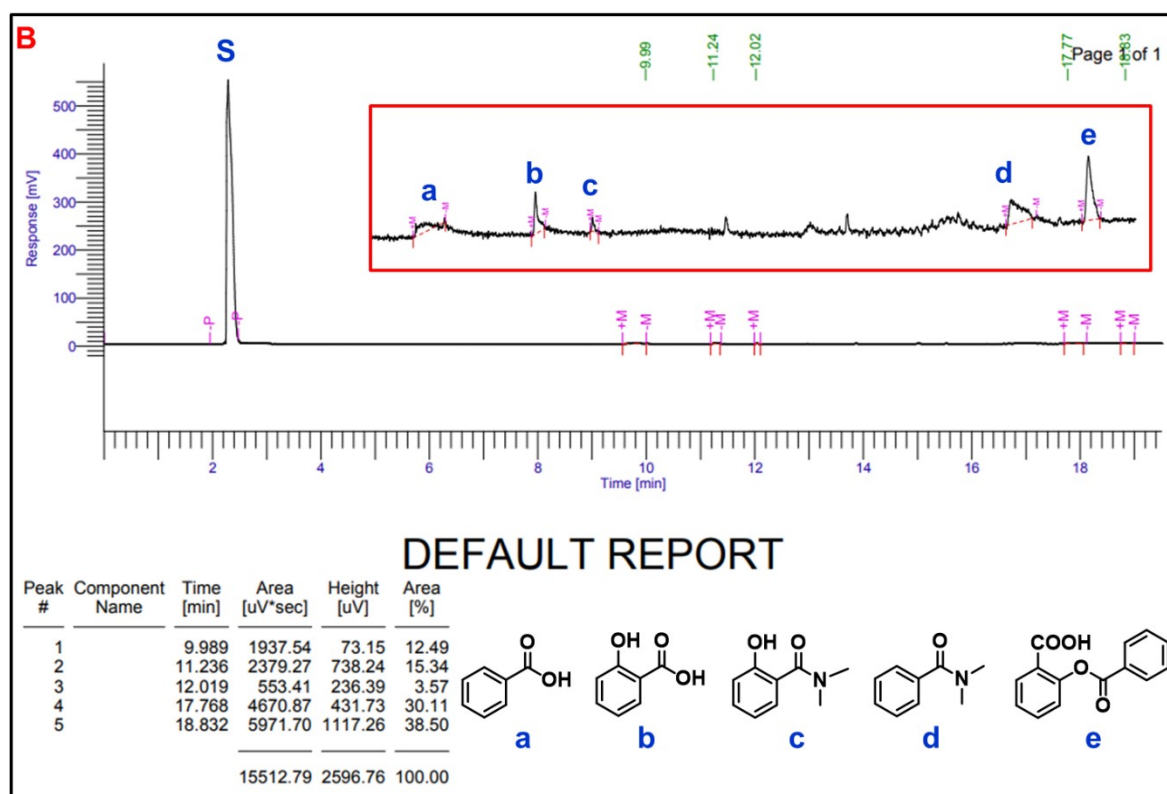

**Fig. S18** Gas chromatogram of the product solution of  $[\text{Ni}(\text{L}^{\text{Me}})(\text{fla})]\text{ClO}_4$  **3** (A) and  $[\text{Ni}(\text{L}^{\text{Br}})(\text{fla})]\text{ClO}_4$  **4** (B) in  $\text{CH}_3\text{OH}$ .

**Figure S19**

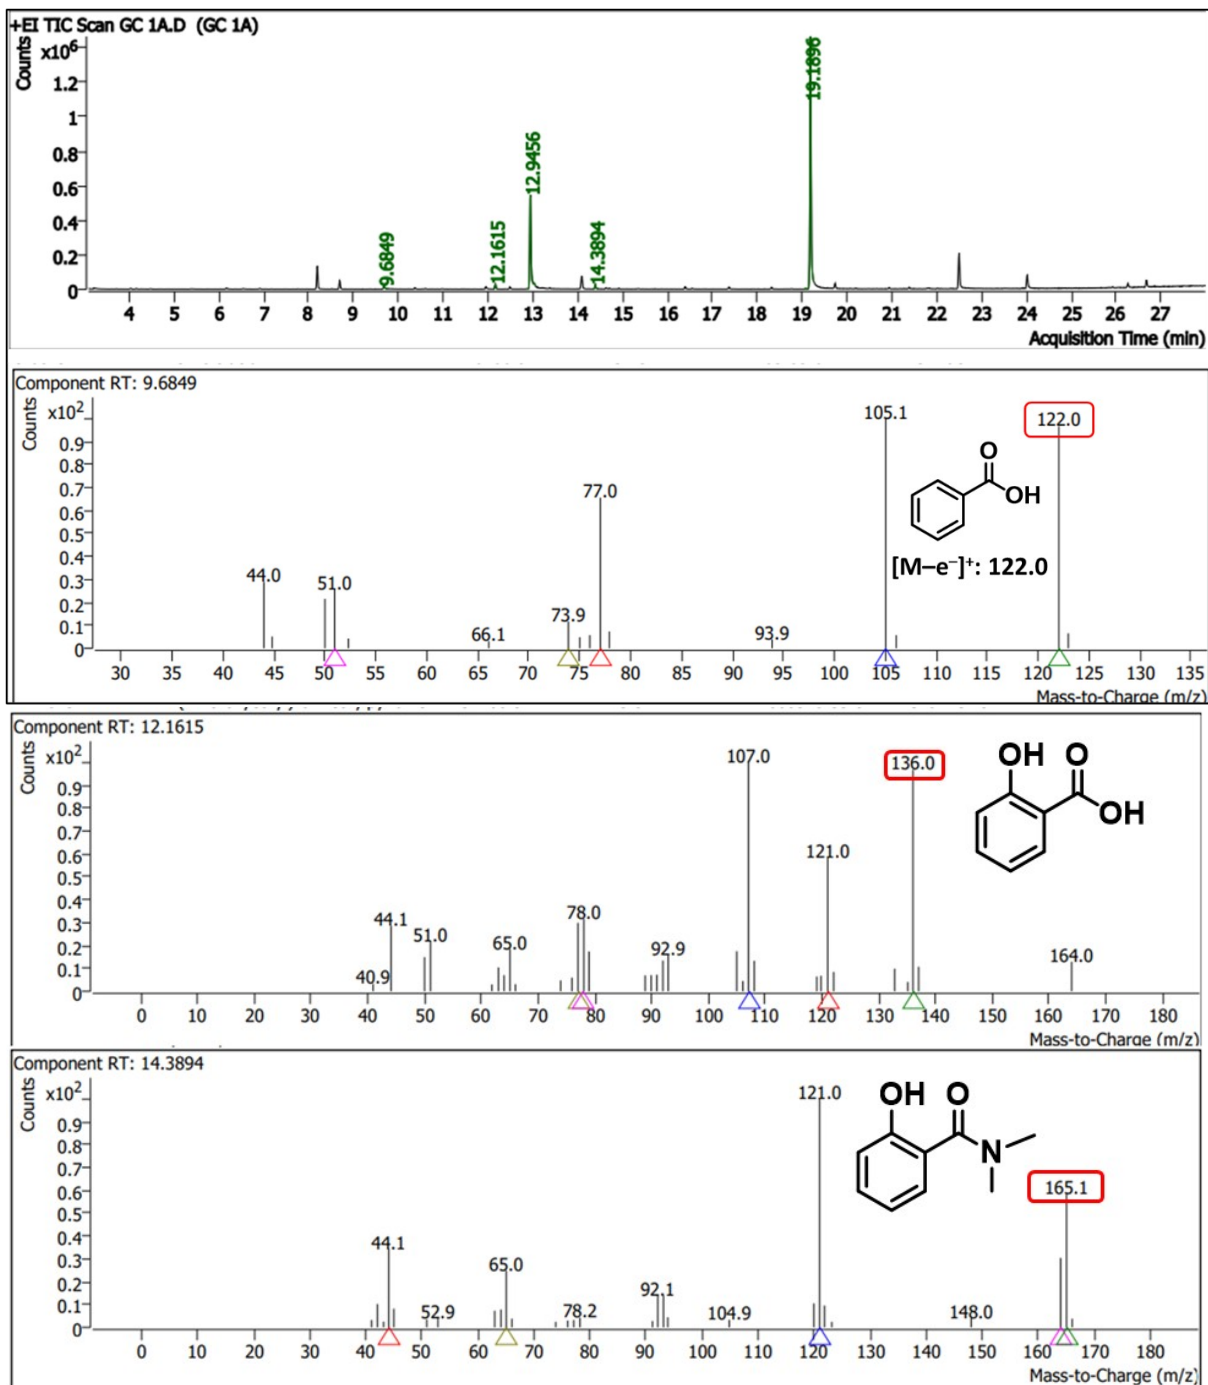

**Fig. S19** GC-MS profile of the product solution of  $[\text{Ni}(\text{L}^{\text{Br}})(\text{fla})]\text{ClO}_4$  **4** in  $\text{CH}_3\text{OH}$ .

**Figure S19a**

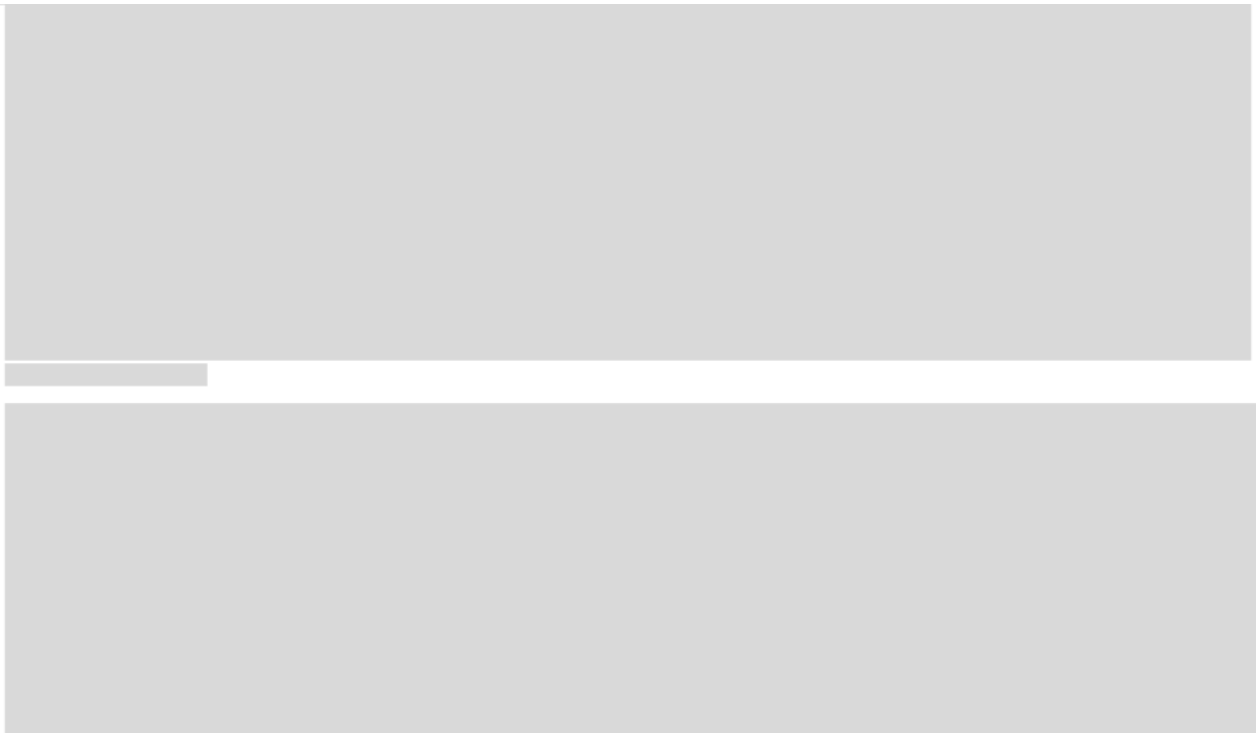

**Fig. S19a** GC-MS profile of the product solution of  $[\text{Ni}(\text{L}^{\text{Br}})(\text{fla})]\text{ClO}_4 \mathbf{4}$  in  $\text{CH}_3\text{OH}$ .

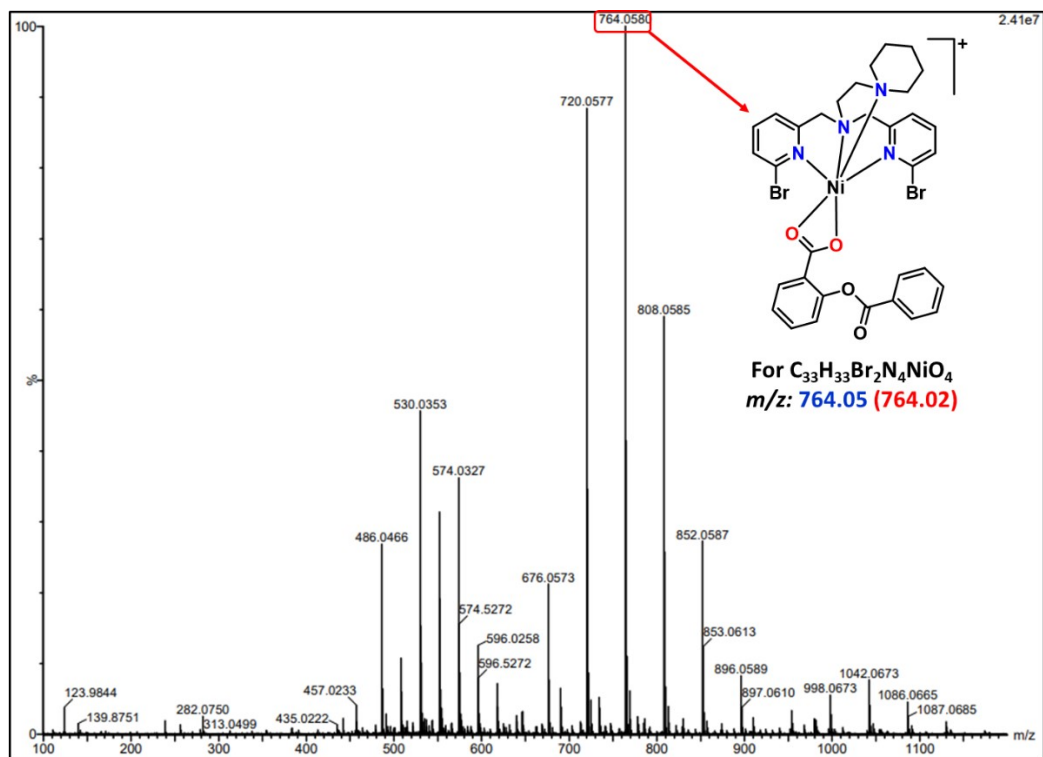

**Fig. S20** ESI-MS profile of kinetic product solution of  $[Ni(L^{Br})(fla)]ClO_4$  **4** recorded in  $CH_3OH$ .

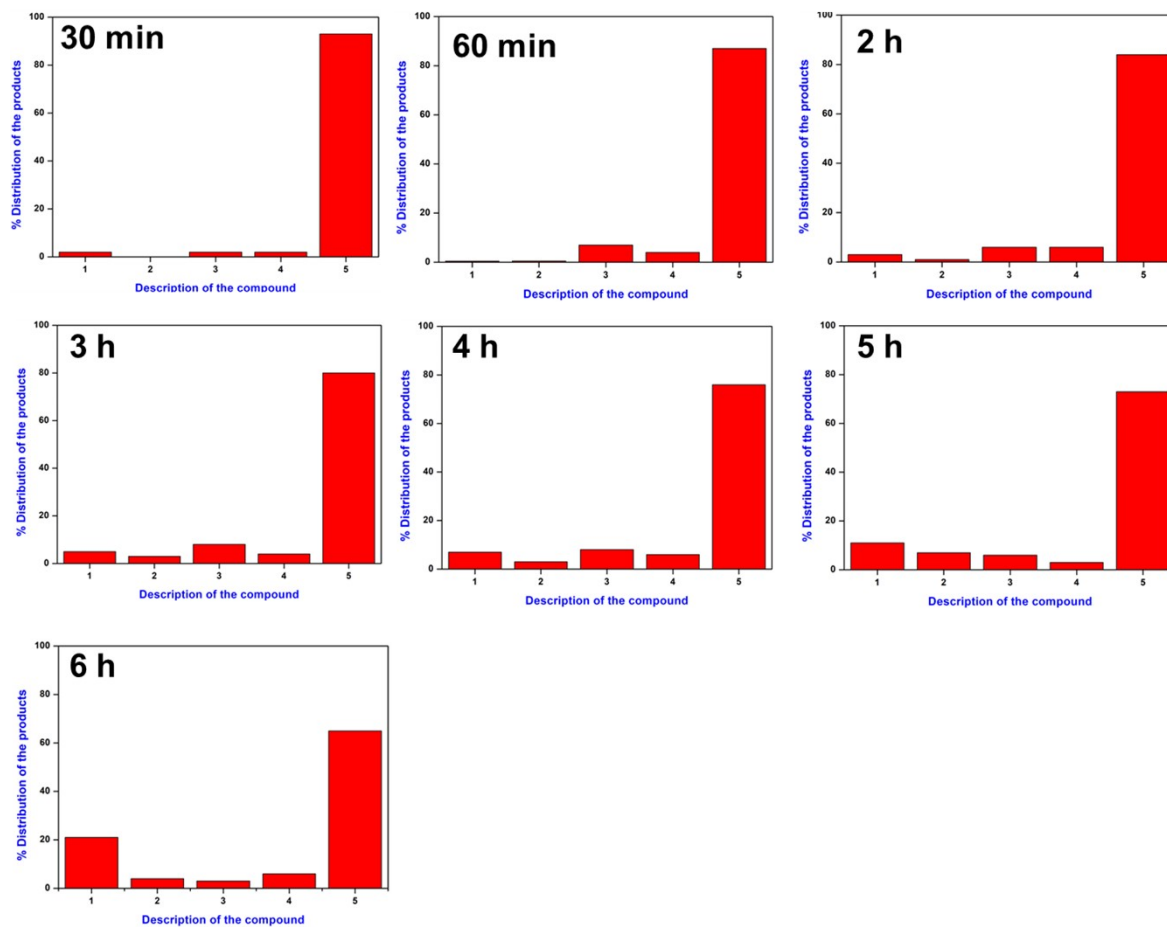

**Fig. S21** Time-dependent product analysis of  $[\text{Ni}(\text{L}^{\text{OMe}})(\text{fla})]\text{ClO}_4$  **3** recorded in  $\text{CH}_3\text{OH}$  at various time intervals (30 min to 6 h).

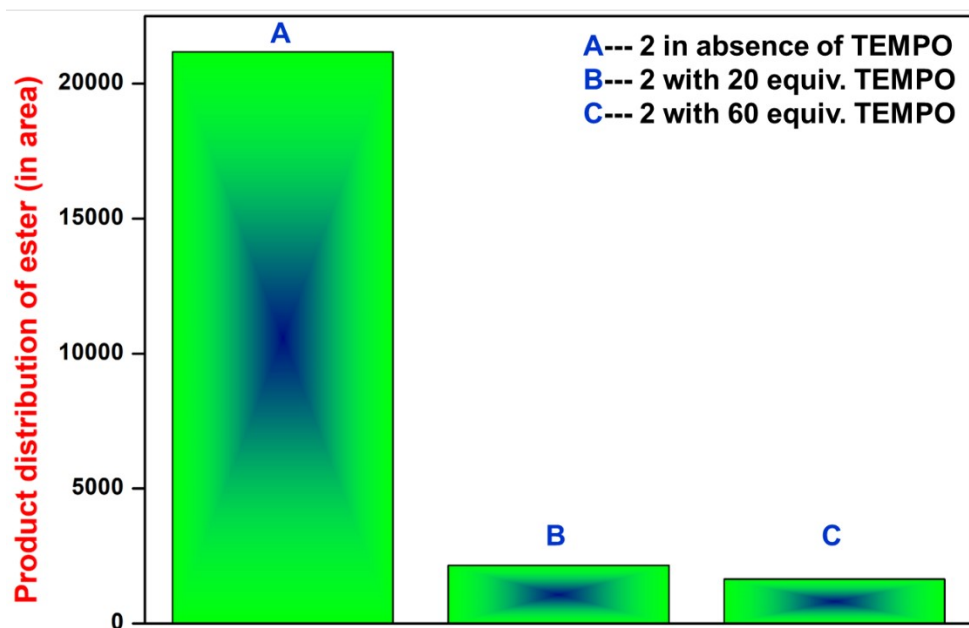

**Fig. S22** Time-dependent product analysis of  $[\text{Ni}(\text{L}^{\text{OMe}})(\text{fla})]\text{ClO}_4$  **3** in the absence and presence of different equiv. of TEMPO recorded in  $\text{CH}_3\text{OH}$ .

**Table S1.** ATR-FTIR spectral data of ligands ( $L^H-L^{Br}$ ) and their corresponding nickel(II)-flavonolate adducts **1-4**.

| Functional group | IR Stretching frequency (cm <sup>-1</sup> ) |          |          |          |           |          |          |          |
|------------------|---------------------------------------------|----------|----------|----------|-----------|----------|----------|----------|
|                  | $L^H$                                       | <b>1</b> | $L^{Me}$ | <b>2</b> | $L^{OMe}$ | <b>3</b> | $L^{Br}$ | <b>4</b> |
| $\nu(C=O)$       | -                                           | 1550     | -        | 1550     | -         | 1548     | -        | 1544     |
| $\nu(C-H)$       | 2938                                        | 3093     | 2929     | 3087     | 2939      | 2981     | 2968     | 3070     |
| $\nu(C=N)$       | 1588                                        | 1572     | 1597     | 1587     | 1580      | 1570     | 1590     | 1570     |
| $\nu(C-N)$       | 1370                                        | 1228     | 1353     | 1230     | 1305      | 1220     | 1361     | 1214     |
| $\nu(O-H)$       | 3375                                        | 3578     | 3364     | 3544     | 3380      | 3468     | 3396     | 3466     |
